# Supplementary material for: Interplay of a nitro group and metal ions: from coordinative binding to noncovalent semicoordination
Source: Royal Society of Chemistry journal article supplement (doi:10.1039/d4qi00351a), 2024-01-01
Supplement: d4qi00351a1.pdf [file d4qi00351a1.pdf]

## Electronic Supplementary Information

### **Interplay of a Nitro-group and Metal Ions: from Coordinative Binding to Noncovalent Semicoordination**

Vitalii V. Suslonov,<sup>1,2,3</sup> Natalia S. Soldatova,<sup>2</sup> Daniil M. Ivanov,<sup>1,2</sup> Pavel S. Postnikov,<sup>2</sup>  
Rosa M. Gomila,<sup>4</sup> Antonio Frontera,<sup>4</sup> Vadim Yu. Kukushkin,<sup>\*1,5</sup> Nadezhda A. Bokach<sup>\*1,2</sup>

<sup>1</sup> Saint Petersburg State University, 7/9 Universitetskaya Nab., Saint Petersburg 199034, Russian Federation

<sup>2</sup> Research School of Chemistry and Applied Biomedical Sciences, Tomsk Polytechnic University, Tomsk 634034, Russian Federation

<sup>3</sup> S.M. Kirov Academy, Akad. Lebedeva St., 6, Saint Petersburg 194044, Russian Federation

<sup>4</sup> Departament de Química, Universitat de les Illes Balears, Crta. de Valldemossa km 7.5, 07122 Palma de Mallorca (Balears), Spain

<sup>5</sup> Institute of Chemistry and Pharmaceutical Technologies, Altai State University, 656049 Barnaul, Russian Federation

Emails: [v.kukushkin@spbu.ru](mailto:v.kukushkin@spbu.ru); [n.bokach@spbu.ru](mailto:n.bokach@spbu.ru)

\*Corresponding authors

#### **Table of contents**

|                                                              |    |
|--------------------------------------------------------------|----|
| S1. XRD data.....                                            | 2  |
| S2. Consideration of the structures.....                     | 3  |
| S3. Hirshfeld surface analysis .....                         | 7  |
| S4. CSD search results .....                                 | 9  |
| S5. Theoretical studies.....                                 | 14 |
| S6. Crystallization and characterization of <b>1–3</b> ..... | 15 |
| S7. Experimental data.....                                   | 17 |
| References .....                                             | 28 |

## S1. XRD data

**Table S1.** Crystal data and structure refinement for **1**·CH<sub>2</sub>Cl<sub>2</sub>, **2**·MeNO<sub>2</sub>, and **3**·MeNO<sub>2</sub>.

| Identification code                         | <b>1</b> ·CH <sub>2</sub> Cl <sub>2</sub>                                                       | <b>2</b> ·MeNO <sub>2</sub>                                                      | <b>3</b> ·MeNO <sub>2</sub>                                                      |
|---------------------------------------------|-------------------------------------------------------------------------------------------------|----------------------------------------------------------------------------------|----------------------------------------------------------------------------------|
| Empirical formula                           | C <sub>35</sub> H <sub>32</sub> Cl <sub>2</sub> I <sub>2</sub> N <sub>6</sub> NiO <sub>10</sub> | C <sub>35</sub> H <sub>33</sub> I <sub>2</sub> N <sub>7</sub> O <sub>12</sub> Pd | C <sub>35</sub> H <sub>33</sub> I <sub>2</sub> N <sub>7</sub> O <sub>12</sub> Pt |
| Formula weight                              | 1080.07                                                                                         | 1103.88                                                                          | 1192.57                                                                          |
| Temperature/K                               | 100(2)                                                                                          | 100(2)                                                                           | 100(2)                                                                           |
| Crystal system                              | monoclinic                                                                                      | monoclinic                                                                       | monoclinic                                                                       |
| Space group                                 | C2/c                                                                                            | C2/c                                                                             | C2/c                                                                             |
| a/Å                                         | 22.4636(5)                                                                                      | 22.5407(2)                                                                       | 22.5831(3)                                                                       |
| b/Å                                         | 12.6983(3)                                                                                      | 12.83600(10)                                                                     | 12.8189(2)                                                                       |
| c/Å                                         | 13.5865(2)                                                                                      | 13.66040(10)                                                                     | 13.6642(2)                                                                       |
| α/°                                         | 90                                                                                              | 90                                                                               | 90                                                                               |
| β/°                                         | 98.051(2)                                                                                       | 97.8870(10)                                                                      | 98.0300(10)                                                                      |
| γ/°                                         | 90                                                                                              | 90                                                                               | 90                                                                               |
| Volume/Å <sup>3</sup>                       | 3837.33(14)                                                                                     | 3915.01(6)                                                                       | 3916.87(10)                                                                      |
| Z                                           | 4                                                                                               | 4                                                                                | 4                                                                                |
| ρ <sub>calc</sub> /cm <sup>3</sup>          | 1.870                                                                                           | 1.873                                                                            | 2.022                                                                            |
| μ/mm <sup>-1</sup>                          | 15.207                                                                                          | 16.820                                                                           | 5.230                                                                            |
| F(000)                                      | 2128.0                                                                                          | 2160.0                                                                           | 2288.0                                                                           |
| Crystal size/mm <sup>3</sup>                | 0.25 × 0.2 × 0.2                                                                                | 0.2 × 0.15 × 0.1                                                                 | 0.2 × 0.15 × 0.12                                                                |
| Radiation                                   | CuKα (λ = 1.54184)                                                                              | CuKα (λ = 1.54184)                                                               | MoKα (λ = 0.71073)                                                               |
| 2θ range for data collection/°              | 7.95 to 139.98                                                                                  | 7.92 to 139.978                                                                  | 6.022 to 54.98                                                                   |
| Index ranges                                | -27 ≤ h ≤ 27<br>-13 ≤ k ≤ 15<br>-16 ≤ l ≤ 15                                                    | -27 ≤ h ≤ 27<br>-15 ≤ k ≤ 15<br>-15 ≤ l ≤ 16                                     | -28 ≤ h ≤ 19<br>-15 ≤ k ≤ 16<br>-15 ≤ l ≤ 17                                     |
| Reflections collected                       | 16864                                                                                           | 49287                                                                            | 8309                                                                             |
| Independent reflections                     | 3639 [R <sub>int</sub> = 0.0562,<br>R <sub>sigma</sub> = 0.0323]                                | 3723 [R <sub>int</sub> = 0.0494,<br>R <sub>sigma</sub> = 0.0152]                 | 4307 [R <sub>int</sub> = 0.0179,<br>R <sub>sigma</sub> = 0.0257]                 |
| Data/restraints/parameters                  | 3639/0/258                                                                                      | 3723/0/259                                                                       | 4307/0/286                                                                       |
| Goodness-of-fit on F <sup>2</sup>           | 1.040                                                                                           | 1.089                                                                            | 1.043                                                                            |
| Final R indexes [I ≥ 2σ (I)]                | R <sub>1</sub> = 0.0381, wR <sub>2</sub> = 0.1029                                               | R <sub>1</sub> = 0.0264, wR <sub>2</sub> = 0.0735                                | R <sub>1</sub> = 0.0184, wR <sub>2</sub> = 0.0415                                |
| Final R indexes [all data]                  | R <sub>1</sub> = 0.0401, wR <sub>2</sub> = 0.1056                                               | R <sub>1</sub> = 0.0267, wR <sub>2</sub> = 0.0738                                | R <sub>1</sub> = 0.0216, wR <sub>2</sub> = 0.0429                                |
| Largest diff. peak/hole / e Å <sup>-3</sup> | 2.56/-1.19                                                                                      | 0.73/-1.00                                                                       | 0.67/-0.74                                                                       |
| CCDC Nos                                    | 2304939                                                                                         | 2304940                                                                          | 2304938                                                                          |

## S2. Consideration of the structures

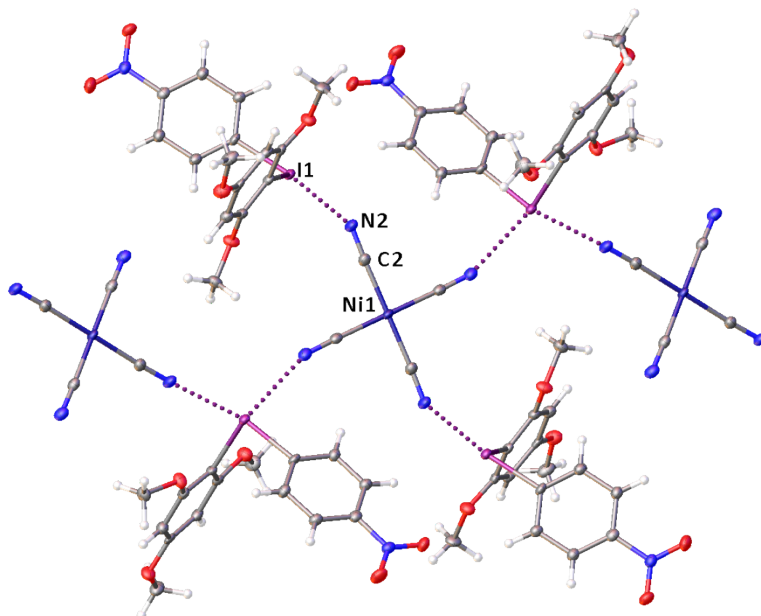

**Figure S1.** A fragment of the HaB-based crystal packing of **1**·CH<sub>2</sub>Cl<sub>2</sub>; CH<sub>2</sub>Cl<sub>2</sub> was omitted for simplicity.

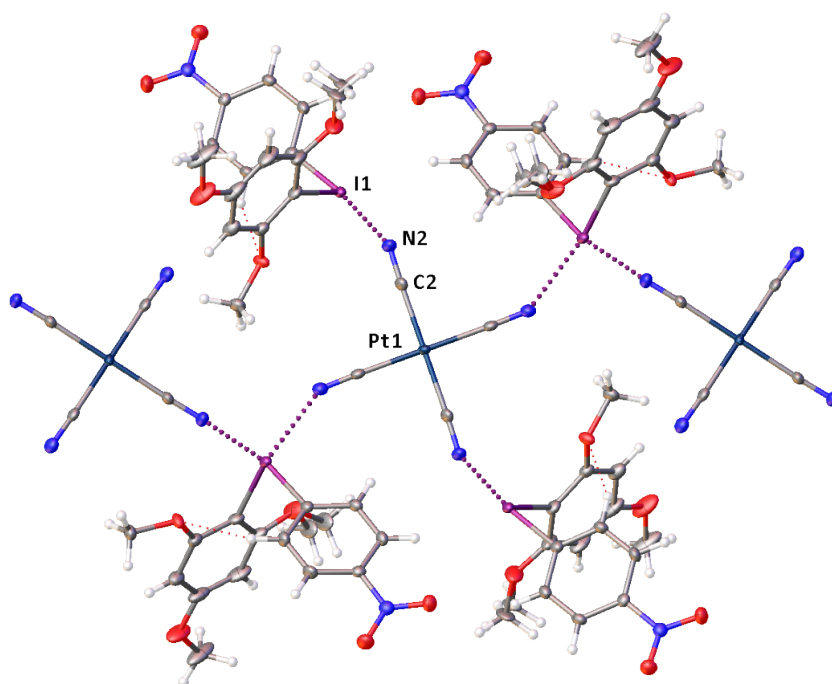

**Figure S2.** A fragment of the HaB-based crystal packing of **3**·MeNO<sub>2</sub>; MeNO<sub>2</sub> was omitted for simplicity.

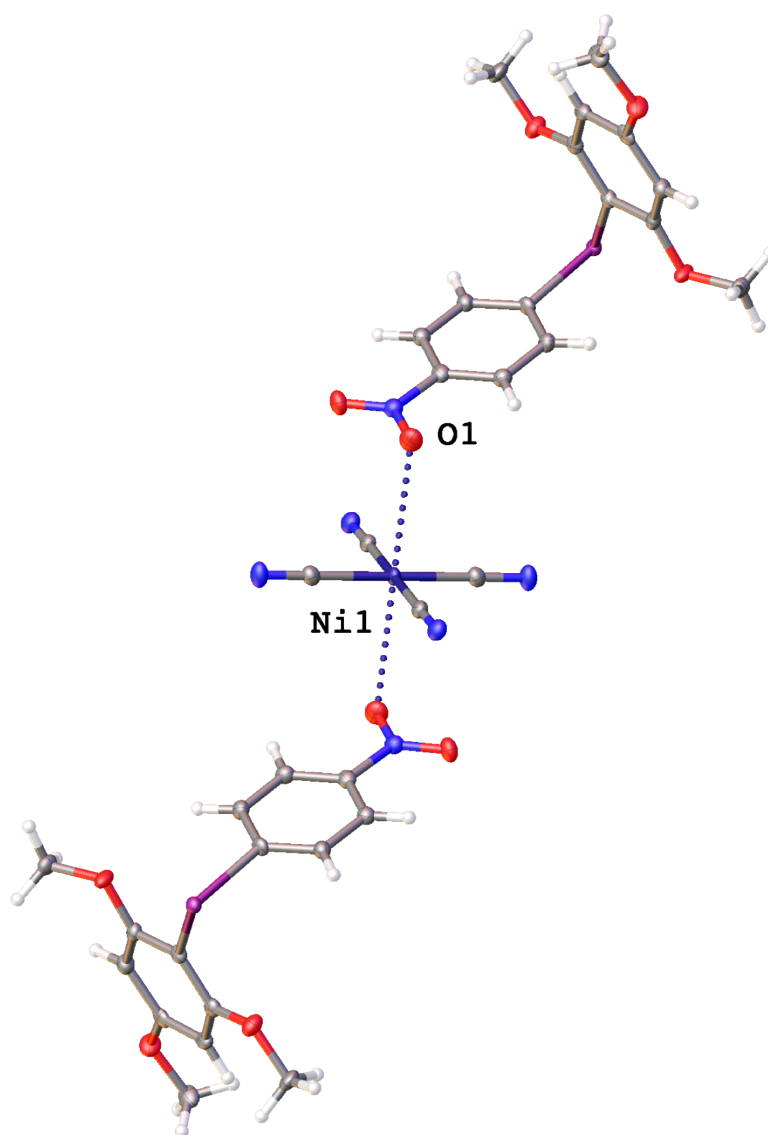

**Figure S3.** A fragment of the crystal packing of  $1 \cdot \text{CH}_2\text{Cl}_2$  showing semicoordination (dotted lines);  $\text{CH}_2\text{Cl}_2$  was omitted for simplicity.

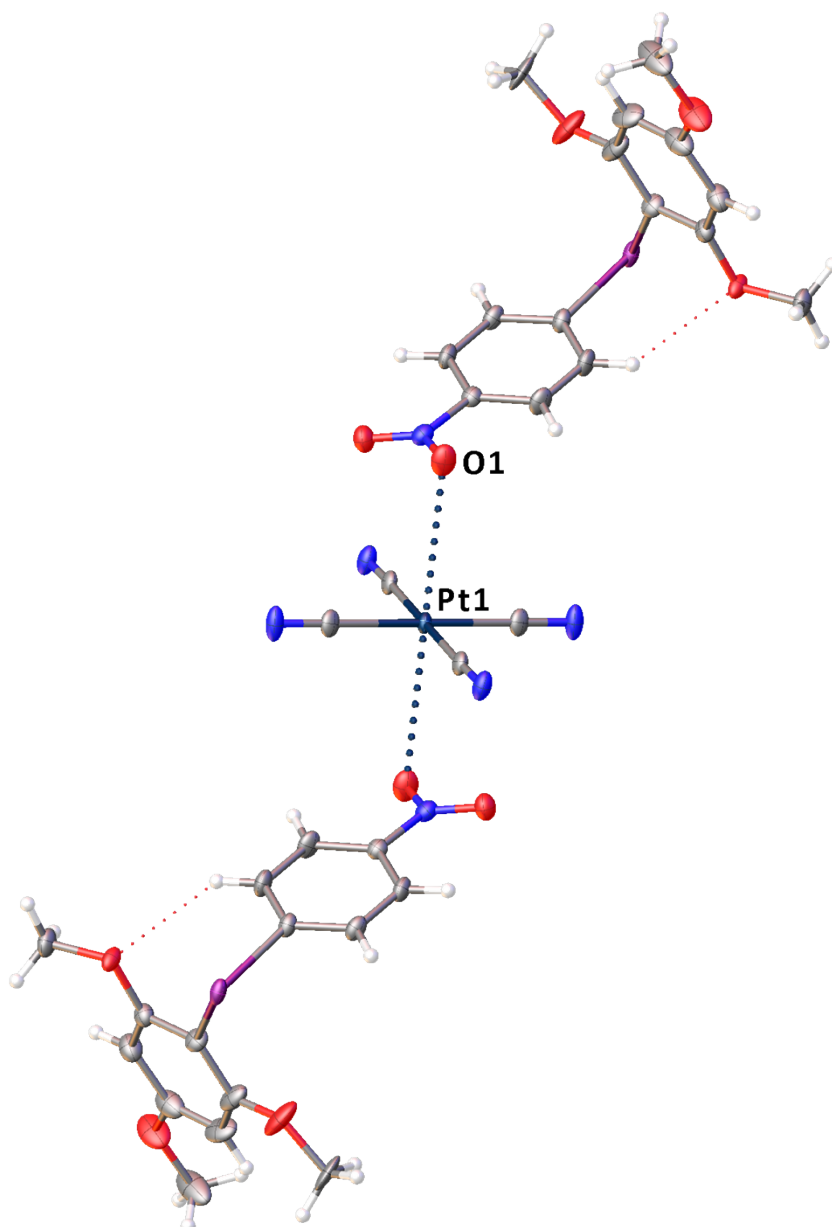

**Figure S4.** A fragment of the crystal packing of  $3 \cdot \text{MeNO}_2$  showing semicoordination (dotted lines);  $\text{MeNO}_2$  was omitted for simplicity.

All XRD structures are composed of the anion  $[\text{M}(\text{CN})_4]^{2-}$  and two  $[\text{Ar}^1\text{Ar}^2\text{I}]^+$  cations and display almost the same HaB-based motif, which includes pseudo-layered architecture (**Figures 1, S1 and 2S; Figure S5, a**). This pattern differs from those previously observed for  $[\text{Ph}_2\text{I}]_2[\text{M}(\text{CN})_4]$  ( $\text{M} = \text{Ni}, \text{Pd}$ )<sup>1</sup> and  $[\text{Ar}^1\text{Ar}^2\text{I}]_2[\text{PtCl}_4]$ .<sup>2, 3</sup> Thus, the complex  $[\text{Ph}_2\text{I}]_2[\text{M}(\text{CN})_4]$ , bearing unsubstituted diaryliodonium cation, forms  $\text{I} \cdots \text{N}$  HaB-based infinite chains with shared vertexes occupied by the  $[\text{M}(\text{CN})_4]^{2-}$  anions (**Figure S5, b**). Structures of  $[\text{Ar}^1\text{Ar}^2\text{I}]_2[\text{PtCl}_4]$  are represented by heterotrimers (**Figure S5, c**). The latter difference between supramolecular motifs is probably related to the difference in interatomic distances between the *cis*-(N)<sub>2</sub> and *cis*-(Cl)<sub>2</sub> nucleophilic centers in the anionic metalates. The differences in the anisotropic distribution of the electron density around these two elements in the respective anions also play a significant role. At

the same time, common feature for all four ligands of each complex is that they are involved in HaB.

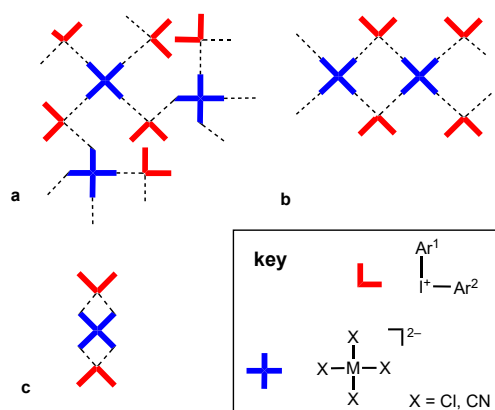

**Figure S5.** Schematic representation of main HaB-based structural motifs for  $[\text{Ar}^1\text{Ar}^2\text{I}]_2[\text{M}(\text{CN})_4]$  ( $\text{M} = \text{Ni}, \text{Pd}, \text{Pt}$ ) (a),  $[\text{Ph}_2\text{I}]_2[\text{M}(\text{CN})_4]$  ( $\text{M} = \text{Ni}, \text{Pd}$ ) (b), and  $[\text{Ar}^1\text{Ar}^2\text{I}]_2[\text{PtCl}_4]$  (c).

The common contact type for the three structures under study is the  $\text{I}\cdots\text{N}$  HaB occurred between the I atom of the iodonium cation and N atom of a  $\text{CN}^-$  ligand; all observed contacts fulfill the IUPAC criteria<sup>4</sup> for the identification of HaB, which belong to Type-II<sup>4</sup> halogen-halogen interactions (**Table S2**). The  $\text{I}\cdots\text{N}$  distances are in the range 2.78–2.94 Å and the shortest separations (2.768(3) Å; 78% of Bondi  $\Sigma_{\text{vdW}}$  I + N were observed for **2**). The  $\angle\text{C}-\text{I}-\text{N}$  angles (168–171°) tend to linear. Each iodonium cation form two 2-center HaBs because the iodine atom exhibits two  $\sigma$ -holes on the extension of each C–I covalent bonds.

**Table S2.**  $\text{I}\cdots\text{N}$  HaB in the structures of  $[\text{Ar}^1\text{Ar}^2\text{I}]_2[\text{M}(\text{CN})_4]$ .

| Nos                         | Contact               | $d(\text{I}\cdots\text{N})$ , Å | $\angle\text{C}-\text{I}\cdots\text{N}$ , ° | $\angle\text{I}\cdots\text{N}-\text{C}$ , ° |
|-----------------------------|-----------------------|---------------------------------|---------------------------------------------|---------------------------------------------|
| <b>1</b>                    | C3–I1 $\cdots$ N2–C2  | 2.780(3)                        | 168.46(13)                                  | 140.1(3)                                    |
|                             | C9–I1 $\cdots$ N1–C1  | 2.921(4)                        | 168.88(10)                                  | 140.1(3)                                    |
| <b>2</b> ·MeNO <sub>2</sub> | C3–I1 $\cdots$ N2–C2  | 2.768(3)                        | 168.97(9)                                   | 138.7(3)                                    |
|                             | C12–I1 $\cdots$ N1–C1 | 2.931(3)                        | 171.28(9)                                   | 136.6(2)                                    |
| <b>3</b> ·MeNO <sub>2</sub> | C3–I1 $\cdots$ N2–C2  | 2.775(2)                        | 168.75(8)                                   | 138.3(2)                                    |
|                             | C9–I1 $\cdots$ N1–C1  | 2.936(2)                        | 171.43(8)                                   | 135.9(2)                                    |

<sup>a</sup>  $R_{\text{Bondi}}^5 = d/\Sigma_{\text{vdW}}$ ; Bondi  $\Sigma_{\text{vdW}}$  I + N = 3.53 Å.

The nitro group forms short contacts with solvent molecules ( $\text{CH}_2\text{Cl}_2$  or  $\text{MeNO}_2$ ). These contacts occurred between the N-atom and Cl/O-atoms from the solvent. These contacts can be recognized as  $\pi\text{-hole}_{\text{NO}_2}\cdots\text{lone pair}(\text{Cl}/\text{O})$  interactions.

**Table S3.** The  $\pi$ -hole<sub>NO<sub>2</sub></sub>···Cl/O contacts in the studied structures.

| Structure                                 | Contact | Distance, Å (Nc) | Angle C–N–X, ° | Angle N–X–Y, ° |
|-------------------------------------------|---------|------------------|----------------|----------------|
| <b>1</b> ·CH <sub>2</sub> Cl <sub>2</sub> | N3–Cl1S | 3.301(3) (1.00)  | 83.9(2)        | 98.08(8)       |
| <b>2</b> ·MeNO <sub>2</sub>               | N3–O2S  | 2.955(7) (0.96)  | 90.52(19)      | 104.1(4)       |
| <b>3</b> ·MeNO <sub>2</sub>               | N3–O2S  | 2.948(10) (0.96) | 89.3(3)        | 100.4(9)       |

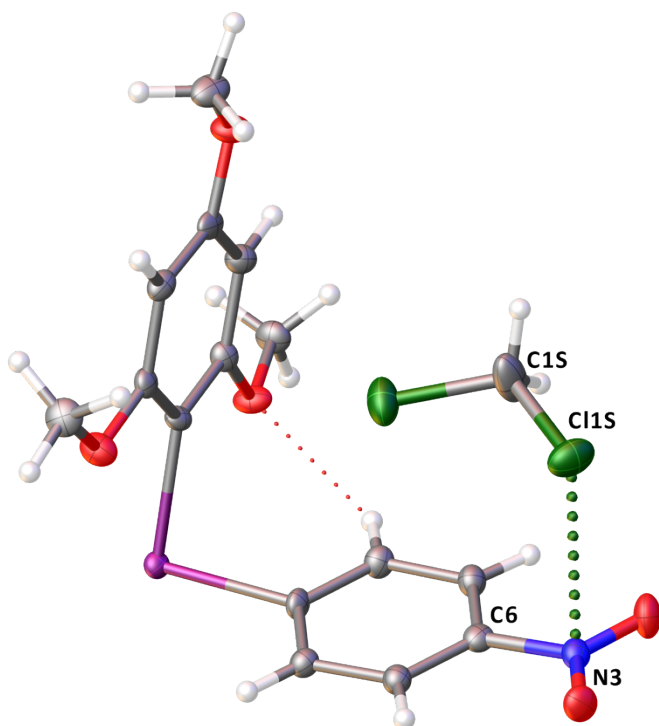

**Figure S6.**  $\pi$ -hole<sub>NO<sub>2</sub></sub>···Cl contact in the structure of **1**·CH<sub>2</sub>Cl<sub>2</sub>.

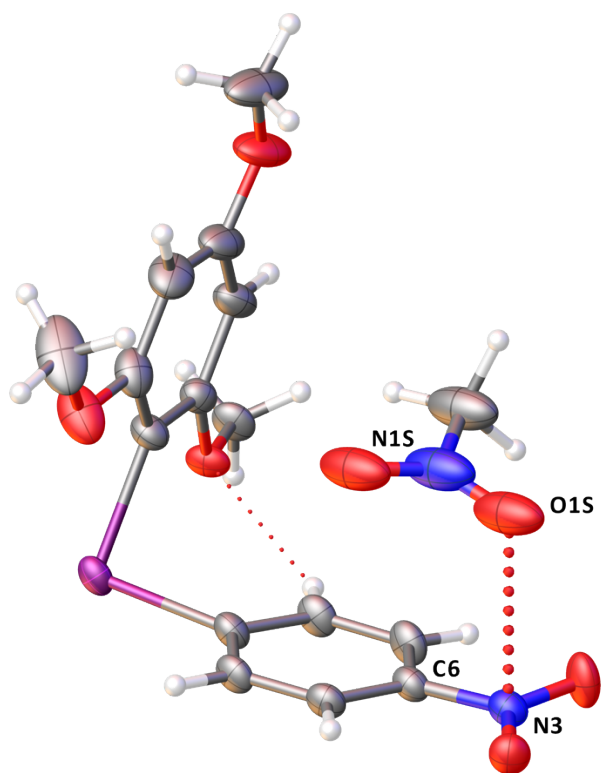

**Figure S7.**  $\pi$ -hole<sub>NO<sub>2</sub></sub>···O contact in the structure of **2**·MeNO<sub>2</sub>.

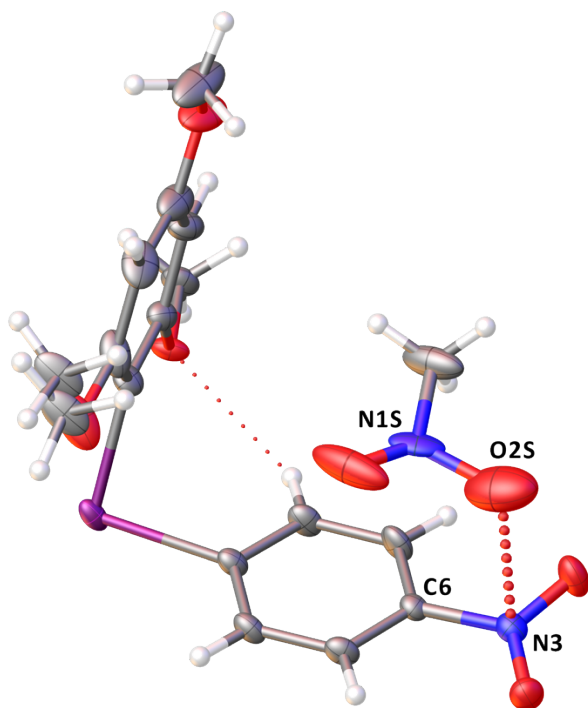

**Figure S8.**  $\pi$ -hole<sub>NO<sub>2</sub></sub>···Cl contact in the structure of **3**·MeNO<sub>2</sub>.



### S3. Hirshfeld surface analysis

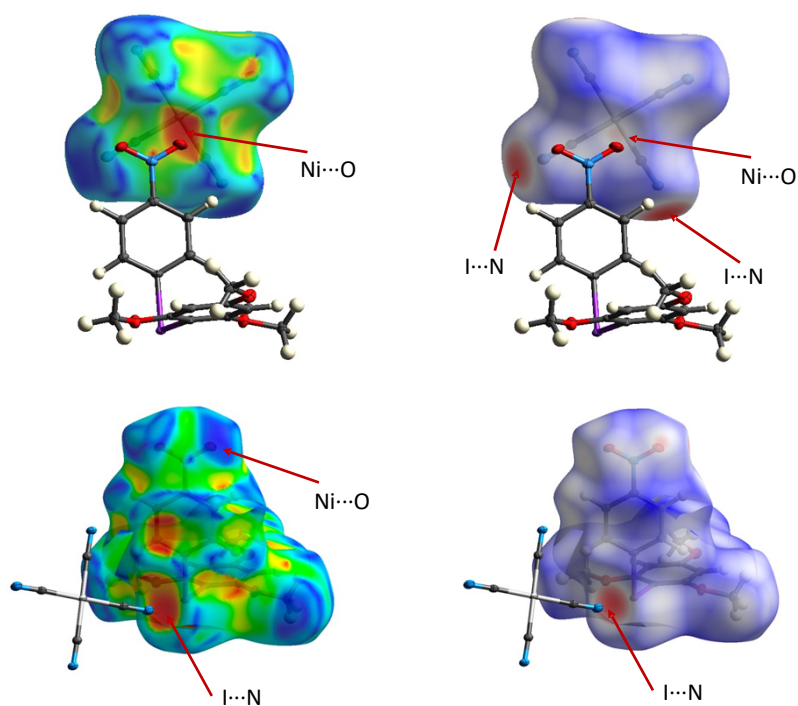

**Figure S9.** Hirshfeld surface of  $[\text{Ni}(\text{CN})_4]^{2-}$  (top) and  $[\{2,4,6\text{-(MeO)}_3\text{C}_6\text{H}_2\}(4\text{-NO}_2\text{-C}_6\text{H}_4)\text{I}]^+$  (bottom) in the structure of  $\mathbf{1} \cdot \text{CH}_2\text{Cl}_2$  mapped with shape index (left panel; the presence of red and blue triangles in the center of the anion, in which the red and blue color represent the bumps and hollow regions on the shape index surfaces, respectively) and  $d_{\text{norm}}$  (right panel) showing the  $\text{Ni} \cdots \text{O}$  short contact and  $\text{I} \cdots \text{N}$  HaBs.

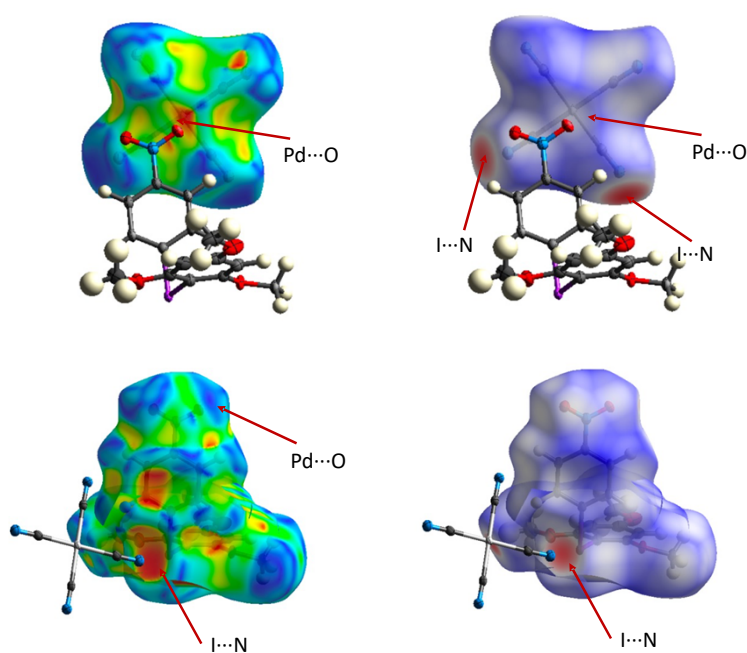

**Figure S10.** Hirshfeld surface of  $[\text{Pd}(\text{CN})_4]^{2-}$  (top) and  $[\{2,4,6\text{-(MeO)}_3\text{C}_6\text{H}_2\}(4\text{-NO}_2\text{-C}_6\text{H}_4)\text{I}]^+$  (bottom) in the structure of  $2 \cdot \text{MeNO}_2$  mapped with shape index (left panel) and  $d_{\text{norm}}$  (right panel) showing the  $\text{Pd} \cdots \text{O}$  short contact and  $\text{I} \cdots \text{N}$  HaBs.

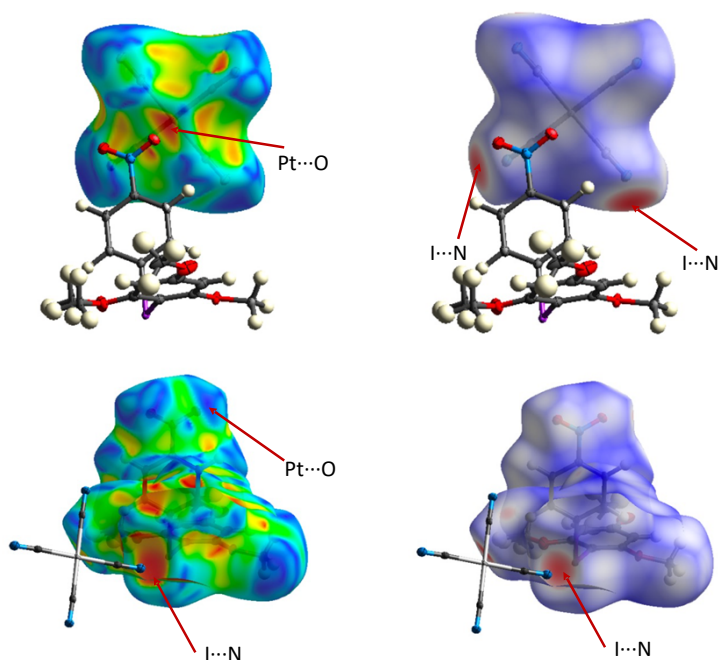

**Figure S11.** Hirshfeld surface of  $[\text{Pt}(\text{CN})_4]^{2-}$  (top) and  $[\{2,4,6\text{-(MeO)}_3\text{C}_6\text{H}_2\}(4\text{-NO}_2\text{-C}_6\text{H}_4)\text{I}]^+$  (bottom) in the structure of  $3 \cdot \text{MeNO}_2$  mapped with shape index (left panel) and  $d_{\text{norm}}$  (right panel) showing the  $\text{Pt} \cdots \text{O}$  short contact and  $\text{I} \cdots \text{N}$  HaBs.

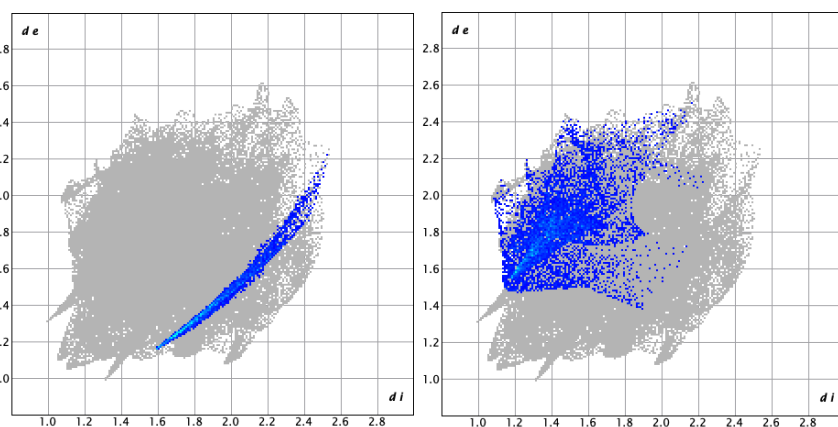

**Figure S12.** The 2D-fingerprint of the Hirshfeld surface of the cation in the structure of  $1 \cdot \text{CH}_2\text{Cl}_2$  demonstrating  $\text{I} \cdots \text{N}$  (left) and  $\text{H} \cdots \text{N}$  (right) contacts. No reciprocal contacts are provided.

**Comments:** Narrow wing in the bottom-right corner (3% of the surface area; left panel) corresponds to  $I \cdots N$  HaB. Wide cloud (8.4% of the surface area; right figure) is due to different types of  $H \cdots N$  contacts including presumably weak attractive  $C-H \cdots N$  HBs.

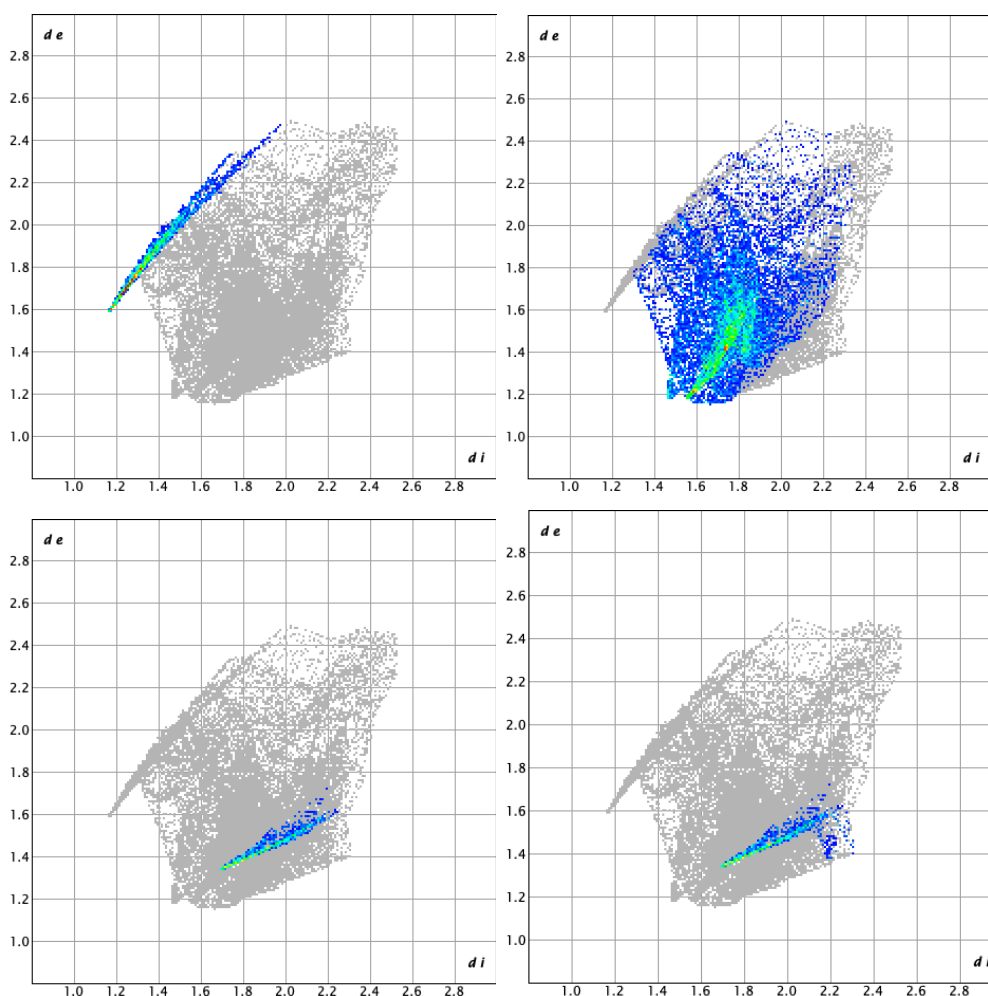

**Figure S13.** The 2D-fingerprint of the Hirshfeld surface of the anion in the structure of  $1 \cdot CH_2Cl_2$  demonstrating  $N \cdots I$  (top-left),  $N \cdots H$  (top-right),  $Ni \cdots O$  (bottom-left), and  $Ni \cdots$  all atoms (bottom-right) contacts. No reciprocal contacts are provided.

**Comments:**

Top-left: Narrow spike in the top-left corner (8.7% of the surface area) corresponds to  $I \cdots N$  HaB.

Top-right: Wide cloud (right figure; 45.7% of the surface area) is due to different types of  $H \cdots N$  contacts, including presumably weak attractive  $C-H \cdots N$  HBs (greenish area).

Bottom-left: Narrow spike in the bottom-right corner corresponds to  $Ni \cdots O$  contact (4.3% of the surface area).

Bottom-right: In comparison with the previous figure, this figure indicates that  $Ni \cdots O$  contact is one of the most significant which involve the Ni atom. Contacts of Ni with all other external atoms

include only 4.7% of the surface area. Apart from  $\text{Ni}\cdots\text{O}$ , other less important interactions include  $\text{Ni}\cdots\text{H}$  contacts.

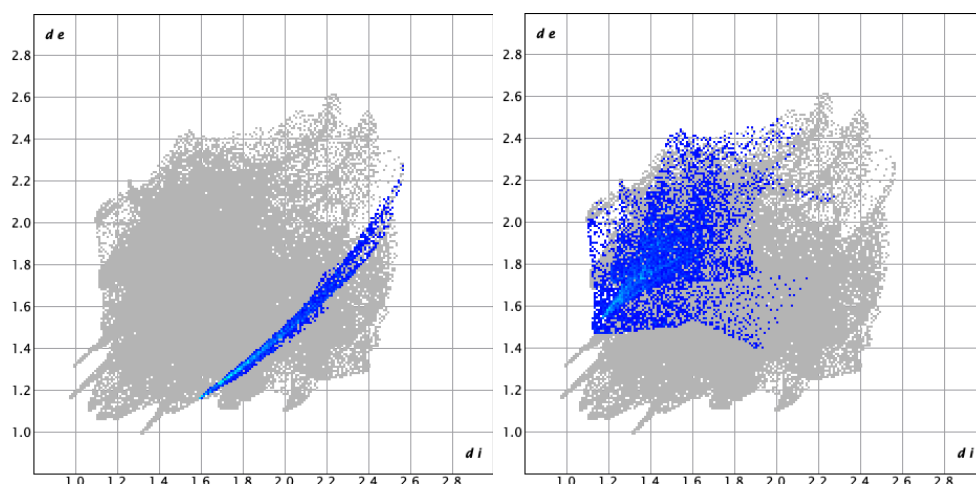

**Figure S14.** The 2D-fingerprint of the Hirshfeld surface of the cation in the structure of  $2\cdot\text{MeNO}_2$  demonstrating  $\text{I}\cdots\text{N}$  (left) and  $\text{H}\cdots\text{N}$  (right) contacts. No reciprocal contacts are provided.

**Comments:** Narrow wing in the bottom-right corner (3% of the surface area; left panel) corresponds to  $\text{I}\cdots\text{N}$  HaB. Wide cloud (8.4% of the surface area; right panel) is due to different types of  $\text{H}\cdots\text{N}$  contacts including presumably weak attractive  $\text{C-H}\cdots\text{N}$  HBs.

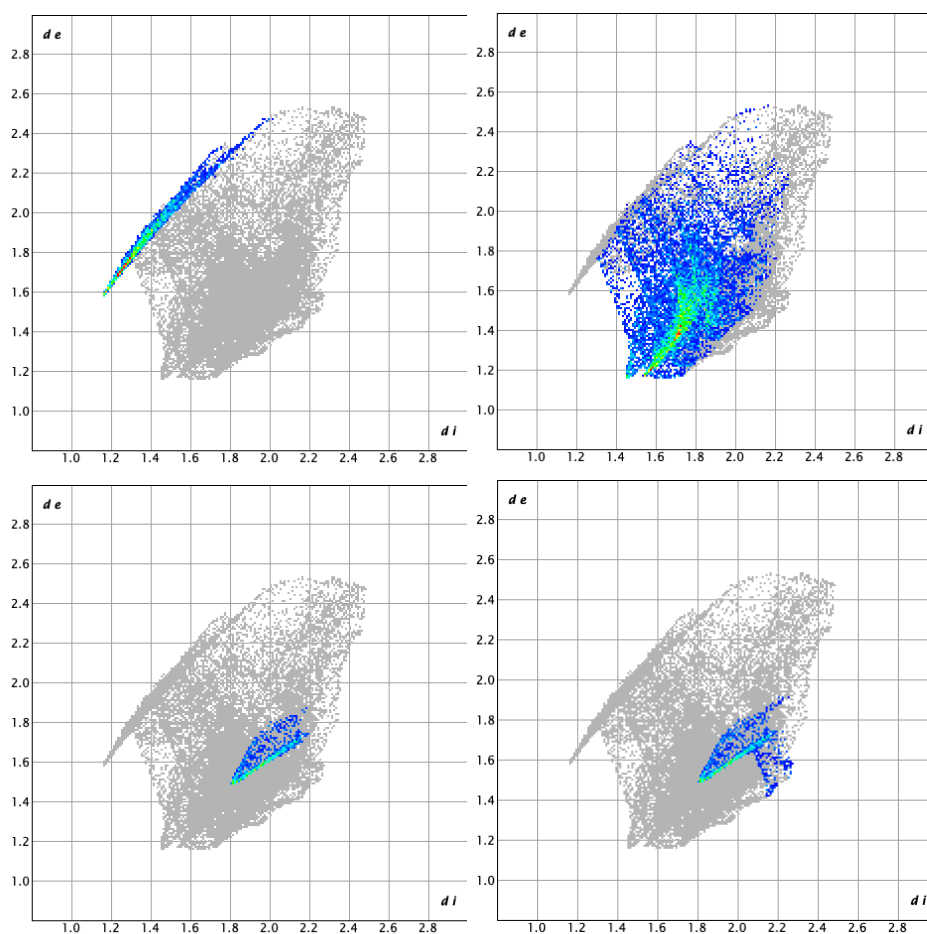

**Figure S15.** The 2D-fingerprint of the Hirshfeld surface of the anion in the structure of **2**·MeNO<sub>2</sub> demonstrating N···I (top-left), N···H (top-right), Pd···O (bottom-left), and Pd···all atoms (bottom-right), contacts. No reciprocal contacts are provided.

**Comments:**

Top-left: Narrow spike in the top-left corner (8.7% of the surface area) corresponds to I···N HaB.

Top-right: Wide cloud (right figure; 44.0% of the surface area) is due to different types of H···N contacts including presumably weak attractive C–H···N HBs (greenish area).

Bottom-left: The spike in the bottom-right corner corresponds to Pd···O contact (4.1% of the surface area).

Bottom-right: In comparison with the previous figure, this figure indicates that Pd···O contact is one of the most significant which include Pd atom. Contacts of Pd center with all other external atoms involves 5.1% of the surface area. Apart Pd···O, other less important contacts include Pd···H.

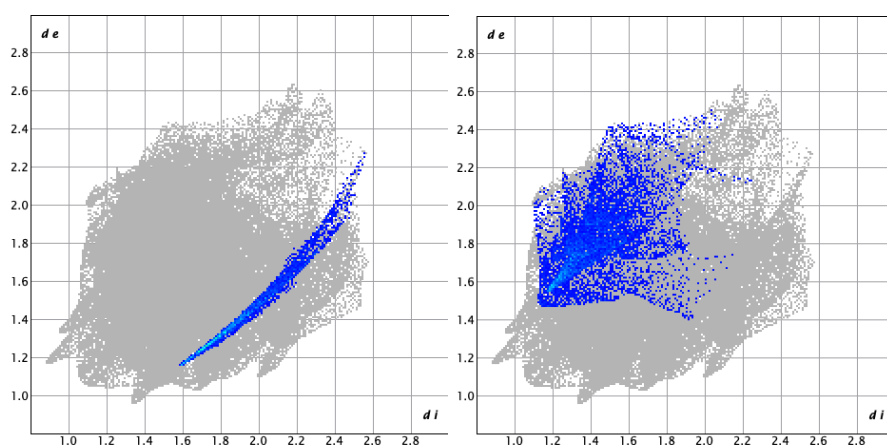

**Figure S16.** The 2D-fingerprint of the Hirshfeld surface of the cation in the structure of **3**·MeNO<sub>2</sub> demonstrating I···N (left) and H···N (right) contacts. No reciprocal contacts are provided.

**Comments:** Narrow wing in the bottom-right corner (3.1% of the surface area; left panel) corresponds to I···N HaB. Wide cloud (8.4% of the surface area; right panel) is due to different types of H···N contacts including presumably weak attractive C–H···N HBs.

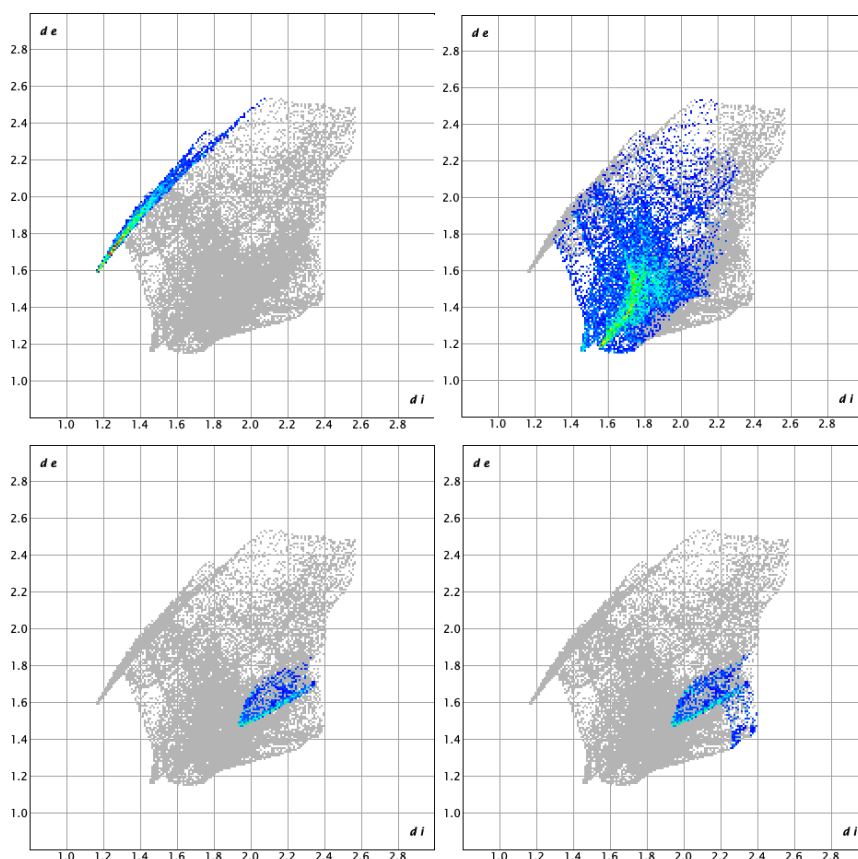

**Figure S17.** The 2D-fingerprint of the Hirshfeld surface of the anion in the structure of **3**·MeNO<sub>2</sub> demonstrating N···I (top-left), N···H (top-right), Pt···O (bottom-left), and Pt···all atoms (right bottom) contacts. No reciprocal contacts are provided.

### Comments:

Top-left: Narrow spike in the top-left corner (8.6% of the surface area) corresponds to I···N HaB.

Top-right: Wide cloud (right figure; 44.1% of the surface area) is due to different types of H···N contacts including presumably weak attractive C–H···N HBs (greenish area).

Bottom-left: Wide spike in the bottom-right corner corresponds to Pt···O contact (3.8% of the surface area).

Bottom-right: In comparison with the previous figure, this figure indicates that Pt···O contact is one of the most significant which include the Pt atom. Contacts of Pt center with all other external atoms involves 5.1% of the surface area. Apart from Pd···O, other less important contacts include Pd···H.

## S4. CSD search results

**Table S4.** CSD data for  $M \cdots O_{NO_2}$  short contacts.

| CSD refcode | Contact       | Distance, Å (Nc)                                                         | Comments                                           |
|-------------|---------------|--------------------------------------------------------------------------|----------------------------------------------------|
| FAFWUG      | Ni $\cdots$ O | 2.930(12) (0.93)                                                         | intermolecular<br>neutral complex                  |
| JAFKEK      | Pd $\cdots$ O | 3.094(4) (0.98)                                                          | intermolecular<br>neutral complex                  |
| NEGNOE      | Pd $\cdots$ O | 2.941(5) (0.93)                                                          | intermolecular<br>cationic complex                 |
| NOPYEW      | Pd $\cdots$ O | 3.114(7) (0.99)                                                          | intermolecular<br>cationic complex                 |
| PAHVEB      | Pd $\cdots$ O | 2.944(3) (0.93)                                                          | intermolecular<br>tetrameric cationic complex      |
| PAHVIF      | Pd $\cdots$ O | 3.090(6) (0.98)                                                          | intermolecular<br>tetrameric cationic complex      |
| SEGMEW      | Ni $\cdots$ O | 3.095(15) (0.98)                                                         | intermolecular<br>coordination polymer             |
| UDUXUN      | Ni $\cdots$ O | 2.941(4) (0.93)                                                          | intermolecular<br>cationic complex                 |
| UFAXOP      | Pd $\cdots$ O | 3.113(17) (0.99)                                                         | intermolecular<br>cationic complex                 |
| WOWQUW      | Pd $\cdots$ O | 2.896(4) (0.92)                                                          | intermolecular<br>cationic coordination<br>polymer |
| VUPGEV      | Ni $\cdots$ O | 2.826(13) (0.90)                                                         | intramolecular<br>coordination polymer             |
| DUZVID      | Pt $\cdots$ O | 3.061(6) (0.94)                                                          | intramolecular<br>neutral complex                  |
| EBUGOY      | Pt $\cdots$ O | 3.187(4) (0.97)                                                          | intramolecular<br>anionic complex                  |
| EBUGUE      | Pt $\cdots$ O | 3.084(5) (0.94)                                                          | intramolecular<br>neutral complex                  |
| EBUHAL      | Pt $\cdots$ O | 3.060(2) (0.94)                                                          | intramolecular<br>neutral complex                  |
| EBUHEP      | Pt $\cdots$ O | 3.2191(16) (0.98)                                                        | intramolecular<br>neutral complex                  |
| FUNLAB      | Pd $\cdots$ O | 2.888(4) (0.92)                                                          | intramolecular<br>neutral complex                  |
| KULKIM      | Pt $\cdots$ O | 3.0457(19) (0.93)                                                        | intramolecular<br>neutral complex                  |
| QENNUT      | Pt $\cdots$ O | 2.918(2) (0.89)                                                          | intramolecular<br>neutral complex                  |
| QENPIJ      | Pt $\cdots$ O | 3.055(8) (0.93)<br>3.081(8) (0.94)<br>3.233(7) (0.99)<br>3.071(7) (0.94) | intramolecular<br>neutral complex                  |
| QENPOP      | Pt $\cdots$ O | 3.082(2) (0.94)                                                          | intramolecular                                     |

|        |        |                                       |                                    |
|--------|--------|---------------------------------------|------------------------------------|
|        |        |                                       | neutral complex                    |
| QENPUV | Pt···O | 3.2429(18) (0.99)                     | intramolecular<br>neutral complex  |
| QENQIK | Pt···O | 3.0357(16) (0.93)                     | intramolecular<br>neutral complex  |
| VESXOG | Ni···O | 2.892(9) (0.92)                       | intramolecular<br>cationic complex |
| SANWAJ | Pd···O | 2.8462(17) (0.90)                     | intramolecular<br>neutral complex  |
| SANWEN | Pd···O | 3.098(4) (0.98)                       | intramolecular<br>neutral complex  |
| AJUXAG | Ni···O | 3.071(3) (0.97)                       | intramolecular<br>neutral complex  |
| AJUXEK | Ni···O | 2.918(2) (0.93)                       | intramolecular<br>neutral complex  |
| AKAMOQ | Ni···O | 2.515(6) (0.80)                       | intramolecular<br>neutral cluster  |
| AKUNEA | Pd···O | 2.831(9)–2.907(4) (0.90)              | intramolecular<br>neutral complex  |
| CEMKOU | Pt···O | 2.9029(19) (0.89)<br>3.015(12) (0.92) | intramolecular<br>neutral complex  |
| DUPZIY | Ni···O | 2.560(4) (0.81)                       | intramolecular<br>neutral complex  |
| EBUHUF | Pt···O | 3.1368(18) (0.96)                     | intramolecular<br>neutral complex  |
| FIPHAN | Pd···O | 2.894(8) (0.92)                       | intramolecular<br>neutral complex  |
| FULTUC | Ni···O | 2.833(3) (0.90)                       | intramolecular<br>neutral complex  |
| HAKQIW | Pd···O | 2.854(2) (0.91)                       | intramolecular<br>neutral complex  |
| HIPDUF | Pd···O | 2.865(4) (0.91)                       | intramolecular<br>cationic complex |
| KEPNIE | Ni···O | 2.870(3) (0.91)<br>3.063(3) (0.97)    | intramolecular<br>neutral complex  |
| KESLEC | Pd···O | 2.829(2) (0.90)                       | intramolecular<br>neutral complex  |
| KOMKEC | Pt···O | 3.12(1) (0.95)                        | intramolecular<br>neutral complex  |
| KULJAD | Pt···O | 3.211(4) (0.98)                       | intramolecular<br>neutral complex  |
| KULJIL | Pt···O | 3.237(9) (0.99)<br>3.181(10) (0.97)   | intramolecular<br>neutral complex  |
| KUZSAZ | Pd···O | 2.784(12) (0.88)<br>2.828(15) (0.90)  | intramolecular<br>cationic complex |
| LATMUO | Pt···O | 3.164(18) (0.97)                      | intramolecular<br>neutral complex  |



|          |        |                                                                                                                |                                     |
|----------|--------|----------------------------------------------------------------------------------------------------------------|-------------------------------------|
| NAYHOK   | Pd···O | 3.099(7) (0.98)                                                                                                | intramolecular<br>neutral complex   |
| NAYHOK01 | Pd···O | 3.105(5) (0.99)                                                                                                | intramolecular<br>neutral complex   |
| QENPAB   | Pt···O | 3.183(2) (0.99)                                                                                                | intramolecular<br>neutral complex   |
| QENQAC   | Pt···O | 3.1703(16) (0.97)                                                                                              | intramolecular<br>neutral complex   |
| QENQOQ   | Pt···O | 3.0532(17) (0.93)                                                                                              | intramolecular<br>neutral complex   |
| SALNEY   | Pd···O | 2.910(3) (0.92)<br>2.911(3) (0.92)                                                                             | intramolecular<br>anionic complex   |
| VINBUP   | Pd···O | 2.85(3) (0.90)<br>2.81(2) (0.89)                                                                               | intramolecular<br>neutral complex   |
| VOKPOA   | Pd···O | 2.756(6) (0.87)                                                                                                | intramolecular<br>cationic complex  |
| WOSYIM   | Pd···O | 2.991(9) (0.95)                                                                                                | intramolecular<br>neutral complex   |
| YASNUB   | Pt···O | 3.112(7) (0.95)<br>3.090(8) (0.94)                                                                             | intramolecular<br>neutral complex   |
| YOBNOT   | Pd···O | 3.0061(16) (0.95)                                                                                              | intramolecular<br>neutral complex   |
| YOBNUZ   | Pd···O | 3.017(2) (0.96)                                                                                                | intramolecular<br>neutral complex   |
| YOBPEL   | Pd···O | 3.006(4) (0.95)<br>2.972(4) (0.94)<br>3.033(3) (0.95)<br>3.004(3) (0.95)<br>3.078(4) (0.98)<br>3.103(4) (0.99) | intramolecular<br>neutral complex   |
| YOBPIP   | Pt···O | 2.994(3) (0.92)<br>3.146(3) (0.96)                                                                             | intramolecular<br>neutral complex   |
| ZAXXII   | Ni···O | 3.069(3) (0.97)                                                                                                | intramolecular<br>neutral complex   |
| ZIVZUB   | Pd···O | 2.954(3) (0.94)                                                                                                | intramolecular<br>neutral complex   |
| AWOMIJ   | Pt···O | 3.271(8) (1.01)                                                                                                | intermolecular*<br>cationic complex |
| MALHEN   | Pt···O | 3.401(3) (1.05)                                                                                                | intermolecular*<br>cationic complex |
| TOKHIM   | Pt···O | 3.351(2) (1.03)                                                                                                | intermolecular*<br>cationic complex |

Hereinafter  $N_c$  is normalized contact distance,  $N_c = d/\sum_{BvdW}$  or  $d/\sum_{AvdW}$ , where  $\sum_{BvdW}$  is Bondi van der Waals radii<sup>5</sup> sum for interacting atoms:  $\sum_{BvdW}(Ni,O) = 3.15$ ;  $\sum_{BvdW}(Pd,O) = 3.15 \text{ \AA}$ ;  $\sum_{BvdW}(Pt,O) = 3.27 \text{ \AA}$ .

\*Criterion distance ( $Pt-O$ )  $\leq (\sum_{vdW} + 0.21 \text{ \AA})$  ( $3.45 \text{ \AA}$ ) was used for selection.

**Table S5.** CSD data for complexes bearing metal-bound NO<sub>2</sub>-group.

| CSD refcode | Bond | Bond length, Å       | Comments                                                                                 |
|-------------|------|----------------------|------------------------------------------------------------------------------------------|
| AMOBEM      | Ni–O | 2.142(6)             | NO <sub>2</sub> in 6-membered chelate ring, Ni <sup>II</sup> , O                         |
| CEFHAW      | Pt–O | 2.0604(8)            | NO <sub>2</sub> in 5-membered chelate ring, Pt <sup>II</sup> , SP                        |
| DOBZOJ      | Ni–O | 2.087(5)             | NO <sub>2</sub> in 6-membered chelate ring, Ni <sup>II</sup> , O                         |
| DUZVID      | Pt–O | 2.138(5)             | NO <sub>2</sub> in 5-membered chelate ring, Pt <sup>II</sup> , SP + short contact Pt···O |
| EBUGOY      | Pt–O | 2.088(3)             | NO <sub>2</sub> in 5-membered chelate ring, Pt <sup>II</sup> , SP + short contact Pt···O |
| EBUGUE      | Pt–O | 2.067(4)             | NO <sub>2</sub> in 5-membered chelate ring, Pt <sup>II</sup> , SP + short contact Pt···O |
| EBUHAL      | Pt–O | 2.0739(19)           | NO <sub>2</sub> in 5-membered chelate ring, Pt <sup>II</sup> , SP + short contact Pt···O |
| EBUHEP      | Pt–O | 2.0843(16)           | NO <sub>2</sub> in 5-membered chelate ring, Pt <sup>II</sup> , SP + short contact Pt···O |
| EBUHIT      | Pt–O | 2.254(5)<br>2.068(3) | NO <sub>2</sub> in 5-membered chelate ring, Pt <sup>II</sup> , O with Pt–Hg bond         |
| EBUHOZ      | Pt–O | 2.283(3)<br>2.071(3) | NO <sub>2</sub> in 5-membered chelate ring, Pt <sup>II</sup> , O with Pt–Hg bond         |
| FEVBAJ      | Ni–O | 2.0509(17)           | NO <sub>2</sub> in 6-membered chelate ring, Ni <sup>II</sup> , O                         |
| FEVPUR      | Pt–O | 2.166(4)<br>2.173(4) | NO <sub>2</sub> in 5-membered chelate ring, Pt <sup>IV</sup> , O                         |
| FUNKUU      | Pd–O | 2.130(5)<br>2.158(6) | NO <sub>2</sub> in 5-membered chelate ring, Pd <sup>II</sup> , SP                        |
| FUNLAB      | Pd–O | 2.137(3)             | NO <sub>2</sub> in 5-membered chelate ring, Pd <sup>II</sup> , SP + short contact Pd···O |
| GUNLAF      | Ni–O | 2.174(3)             | NO <sub>2</sub> in 6-membered chelate ring, Ni <sup>II</sup> , O                         |
| HIPDIT      | Pd–O | 2.014(2)             | NO <sub>2</sub> in 5-membered chelate ring, Pd <sup>II</sup> , SP                        |
| KULHEF      | Pt–O | 1.999(4)             | NO <sub>2</sub> in 5-membered chelate ring, Pt <sup>II</sup> , SP                        |
| KULHIJ      | Pt–O | 1.990(5)             | NO <sub>2</sub> in 5-membered chelate ring, Pt <sup>II</sup> , SP                        |
| KULKAE      | Pt–O | 2.035(4)<br>2.098(4) | NO <sub>2</sub> in 5-membered chelate ring, Pt <sup>IV</sup> , O                         |
| KULKEI      | Pt–O | 2.021(5)             | NO <sub>2</sub> in 5-membered chelate                                                    |

|        |      |                                                                      |                                                                                                                                                       |
|--------|------|----------------------------------------------------------------------|-------------------------------------------------------------------------------------------------------------------------------------------------------|
|        |      | 2.035(5)                                                             | ring, Pt <sup>IV</sup> , O                                                                                                                            |
| KULKIM | Pt–O | 2.0781(15)                                                           | NO <sub>2</sub> in 5-membered chelate ring, Pt <sup>II</sup> , SP + Pt⋯O contact                                                                      |
| KULKOS | Pt–O | 2.080(3)                                                             | NO <sub>2</sub> in 5-membered chelate ring, Pt <sup>II</sup> , SP                                                                                     |
| MECRAN | Ni–O | 2.117(4)                                                             | NO <sub>2</sub> in 6-membered chelate ring, Ni <sup>II</sup> , O                                                                                      |
| QENNUT | Pt–O | 2.0769(17)                                                           | NO <sub>2</sub> in 5-membered chelate ring, Pt <sup>II</sup> , SP                                                                                     |
| QENPIJ | Pt–O | 2.049(6)<br>2.045(6)<br>2.055(6)<br>2.039(6)                         | NO <sub>2</sub> in 5-membered chelate ring, Pt <sup>II</sup> , SP + Pt⋯O contact                                                                      |
| QENPOP | Pt–O | 2.079(2)                                                             | NO <sub>2</sub> in 5-membered chelate ring, Pt <sup>II</sup> , SP + Pt⋯O contact                                                                      |
| QENPUV | Pt–O | 2.0747(16)                                                           | NO <sub>2</sub> in 5-membered chelate ring, Pt <sup>II</sup> , SP + Pt⋯O contact                                                                      |
| QENQIK | Pt–O | 2.0789(18)                                                           | NO <sub>2</sub> in 5-membered chelate ring, Pt <sup>II</sup> , SP + Pt⋯O contact                                                                      |
| RAQKUR | Ni–O | 2.042(3)<br>2.067(3)                                                 | monodentate MeNO <sub>2</sub> , Ni <sup>0</sup> (in [Ni(MeNO <sub>2</sub> ) <sub>2</sub> (Et <sub>2</sub> O)(lin-NO)](PF <sub>6</sub> )), distorted T |
| TAQFUO | Ni–O | 2.033(6)<br>2.050(4)<br>2.054(3)                                     | monodentate MeNO <sub>2</sub> , Ni <sup>0</sup> (in [Ni(MeNO <sub>2</sub> ) <sub>3</sub> (lin-NO)](PF <sub>6</sub> )), distorted T                    |
| TETZAW | Ni–O | 2.136(4)<br>2.171(3)                                                 | NO <sub>2</sub> in 6-membered chelate ring, Ni <sup>II</sup> , O                                                                                      |
| TETZEA | Ni–O | 2.123(7)<br>2.100(7)                                                 | NO <sub>2</sub> in 6-membered chelate ring, Ni <sup>II</sup> , O                                                                                      |
| YOBPUB | Pd–O | 2.019(3)                                                             | NO <sub>2</sub> in 5-membered chelate ring, Pd <sup>II</sup> <sub>2</sub> , TP with Pd-Pd bond                                                        |
| ZETWEE | Ni–O | 2.052(5)<br>2.056(4)<br>2.033(5)<br>2.057(4)<br>2.045(3)<br>2.057(4) | NO <sub>2</sub> in 6-membered chelate ring, Ni <sup>II</sup> , O                                                                                      |
| ZOMYEI | Pd–O | 2.2782(14)                                                           | monodentate RNO <sub>2</sub> , Pt <sup>II</sup> , SP                                                                                                  |

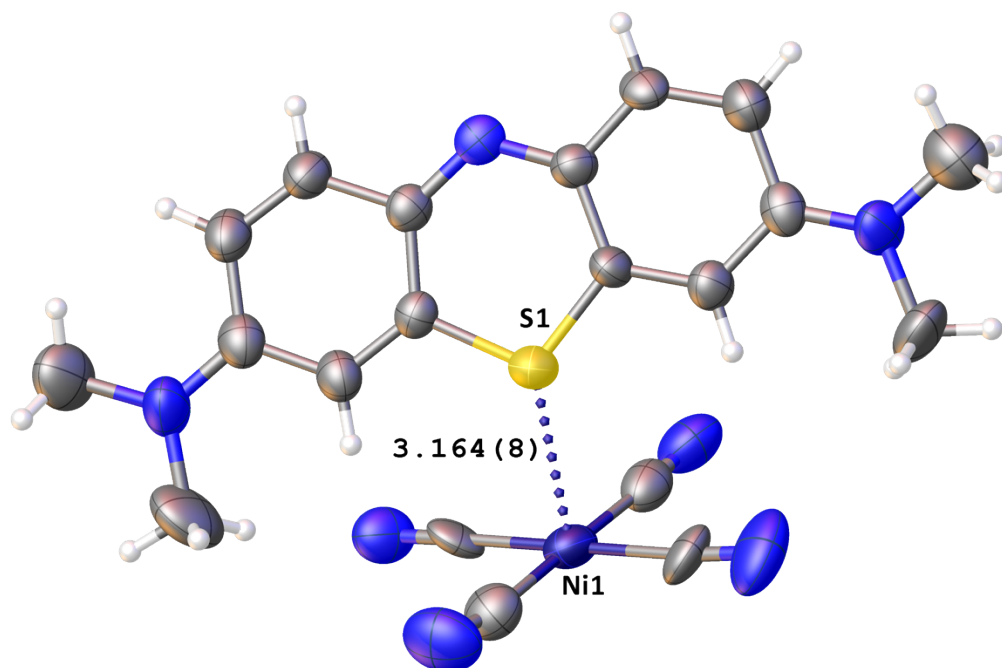

**Figure S18.** View of the structure KUMWIB, demonstration intermolecular contact Ni $\cdots$ S.

## S5. Theoretical studies

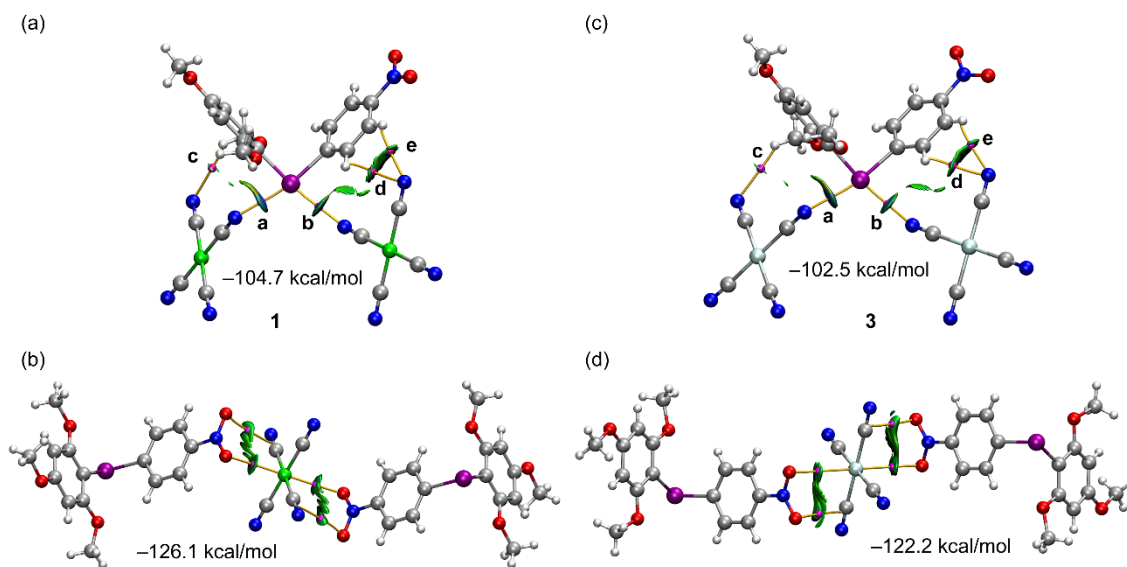

**Figure S19.** QTAIM (bond CPs in red and bond paths as solid lines) and NCIPLOT (see theoretical methods for settings) of the halogen bonded (a,c) and Pd $\cdots$ O<sub>NO<sub>2</sub></sub> (b,d) bonded trimers of compounds **1** (left) and **3** (right). Only intermolecular contacts are shown. The interaction energies are also indicated.

## S6. Crystallization and characterization of 1–3

**Crystallization of [ $\{2,4,6\text{-(MeO)}_3\text{C}_6\text{H}_2\}\{4\text{-NO}_2\text{-C}_6\text{H}_4\}\text{I}\}_2[\text{M}(\text{CN})_4]$  (1–3).** A solution of any one of  $(\text{PPN})_2[\text{M}(\text{CN})_4]$  (15.5  $\mu\text{mol}$ ) in  $\text{MeNO}_2$  (for **2** and **3**) or  $\text{CH}_2\text{Cl}_2$  (for **1**) (2 mL) was added to a solution of [ $\{2,4,6\text{-(MeO)}_3\text{C}_6\text{H}_2\}\{4\text{-NO}_2\text{-C}_6\text{H}_4\}\text{I}\}(\text{CF}_3\text{CO}_2)$  (31.0  $\mu\text{mol}$ ) in  $\text{MeNO}_2$  or  $\text{CH}_2\text{Cl}_2$  (2 mL) and the resulting homogeneous solution was left to stand for several days at room temperature for slow evaporation, whereupon a few crystals suitable for XRD were manually separated. Solid residues were dried in air at RT. The presence of halogens (iodine in our particular case) in any structure spoils the column of an analyzer and, and usually leads to poorly reproducible data. In addition to the XRD, we characterized the obtained compounds using FTIR (in KBr) and ATR-FTIR spectroscopy and HRESI mass-spectrometry. All species exhibit peaks from the iodonium cation [ $\{2,4,6\text{-(MeO)}_3\text{C}_6\text{H}_2\}\{4\text{-NO}_2\text{-C}_6\text{H}_4\}\text{I}\}^+$  in their positive mode mass-spectra and also peaks of the dianion  $[\text{M}(\text{CN})_4]^{2-}$  and its fragmentation ion,  $[\text{M}(\text{CN})_3]^-$ , in the negative mode mass-spectra.

**1.** IR (KBr, selected bands,  $\text{cm}^{-1}$ ): 3094, 3011 w  $\nu(\text{C}_{\text{Ar}}\text{-H})$ , 2949, 2851 w  $\nu(\text{C}_{\text{Me}}\text{-H})$ , 2115 and 2105 s  $\nu(\text{C}\equiv\text{N})$ , 1586 s  $\nu(\text{CC}_{\text{Ar}})$ , 1529 s  $\nu(\text{NO}_2 \text{ asym})$ , 1468 m-s  $\nu(\text{CC}_{\text{Ar}})$ , 1343 s  $\nu(\text{NO}_2 \text{ sym})$ , 1229 s, 1207 m-s and 1124 s  $\nu(\text{C-O})$ , 849 m-s  $\nu(\text{C-N})$  and/or  $\delta(\text{C}_{\text{Ar}}\text{-H})$ , 736 m-s  $\delta(\text{C}_{\text{Ar}}\text{-H})$ . ATR-FTIR (selected bands,  $\text{cm}^{-1}$ ): 3099, 3011 w  $\nu(\text{C}_{\text{Ar}}\text{-H})$ , 2950, 2852 w  $\nu(\text{C}_{\text{Me}}\text{-H})$ , 2114 and 2105 s  $\nu(\text{C}\equiv\text{N})$ , 1582 s  $\nu(\text{CC}_{\text{Ar}})$ , 1526 s  $\nu(\text{NO}_2 \text{ asym})$ , 1468 m-s  $\nu(\text{CC}_{\text{Ar}})$ , 1343 s  $\nu(\text{NO}_2 \text{ sym})$ , 1227 s, 1206 m-s and 1123 s  $\nu(\text{C-O})$ , 849 m-s  $\nu(\text{C-N})$  and/or  $\delta(\text{C}_{\text{Ar}}\text{-H})$ , 736 m-s  $\delta(\text{C}_{\text{Ar}}\text{-H})$ . HRESI<sup>+</sup>-MS:  $m/z$ : 415.9983 [ $\{2,4,6\text{-(MeO)}_3\text{C}_6\text{H}_2\}\{4\text{-NO}_2\text{-C}_6\text{H}_4\}\text{I}\}^+$  (calcd 415.9989). HRESI<sup>-</sup>-MS:  $m/z$ : 135.9456  $[\text{Ni}(\text{CN})_3]^-$  (calcd 135.9451).

**2.** IR (KBr, selected bands,  $\text{cm}^{-1}$ ): 3092, 3011 w  $\nu(\text{C}_{\text{Ar}}\text{-H})$ , 2949, 2852 w  $\nu(\text{C}_{\text{Me}}\text{-H})$ , 2129 and 2120 s  $\nu(\text{C}\equiv\text{N})$ , 1586 s  $\nu(\text{CC}_{\text{Ar}})$ , 1529 m-s  $\nu(\text{NO}_2 \text{ asym})$ , 1469 m-s  $\nu(\text{CC}_{\text{Ar}})$ , 1343 s  $\nu(\text{NO}_2 \text{ sym})$ , 1229 s, 1207 m-s and 1124 s  $\nu(\text{C-O})$ , 850 m-s  $\nu(\text{C-N})$  and/or  $\delta(\text{C}_{\text{Ar}}\text{-H})$ , 736 m  $\delta(\text{C}_{\text{Ar}}\text{-H})$ . ATR (selected bands,  $\text{cm}^{-1}$ ): 3094, 3012 w  $\nu(\text{C}_{\text{Ar}}\text{-H})$ , 2949, 2851 w  $\nu(\text{C}_{\text{Me}}\text{-H})$ , 2129 and 2119 s  $\nu(\text{C}\equiv\text{N})$ , 1584 s  $\nu(\text{CC}_{\text{Ar}})$ , 1528 m-s  $\nu(\text{NO}_2 \text{ asym})$ , 1470 m-s  $\nu(\text{CC}_{\text{Ar}})$ , 1344 s  $\nu(\text{NO}_2 \text{ sym})$ , 1229 s, 1207 m-s

and 1123 s  $\nu(\text{C-O})$ , 849 m-s  $\nu(\text{C-N})$  and/or  $\delta(\text{C}_{\text{Ar}}\text{-H})$ , 737 m  $\delta(\text{C}_{\text{Ar}}\text{-H})$ . HRESI<sup>+</sup>-MS:  $m/z$ : 415.9985 [ $\{2,4,6\text{-(MeO)}_3\text{C}_6\text{H}_2\}(4\text{-NO}_2\text{-C}_6\text{H}_4)\text{I}\}^+$  (calcd 415.9989). HRESI<sup>-</sup>-MS:  $m/z$ : 104.9579  $[\text{Pd}(\text{CN})_4]^{2-}$  (calcd 104.9585), 183.9136  $[\text{Pd}(\text{CN})_3]^-$  (calcd 183.9134).

**3.** IR (KBr, selected bands,  $\text{cm}^{-1}$ ): 3092, 3011 w  $\nu(\text{C}_{\text{Ar}}\text{-H})$ , 2949, 2924, 2851 w  $\nu(\text{C}_{\text{Me}}\text{-H})$ , 2116(sh) s  $\nu(\text{C}\equiv\text{N})$ , 1586 s  $\nu(\text{CC}_{\text{Ar}})$ , 1530 m-s  $\nu(\text{NO}_2 \text{ asym})$ , 1470 m-s  $\nu(\text{CC}_{\text{Ar}})$ , 1344 s  $\nu(\text{NO}_2 \text{ sym})$ , 1229 s, 1207 m-s and 1124 s  $\nu(\text{C-O})$ , 849 m-s  $\nu(\text{C-N})$  and/or  $\delta(\text{C}_{\text{Ar}}\text{-H})$ , 736 m  $\delta(\text{C}_{\text{Ar}}\text{-H})$ . ATR (selected bands,  $\text{cm}^{-1}$ ): 3092, 3012 w  $\nu(\text{C}_{\text{Ar}}\text{-H})$ , 2949, 2924, 2851 w  $\nu(\text{C}_{\text{Me}}\text{-H})$ , 2124 and 2116 s  $\nu(\text{C}\equiv\text{N})$ , 1585 s  $\nu(\text{CC}_{\text{Ar}})$ , 1529 m-s  $\nu(\text{NO}_2 \text{ asym})$ , 1469 m-s  $\nu(\text{CC}_{\text{Ar}})$ , 1343 s  $\nu(\text{NO}_2 \text{ sym})$ , 1229 s, 1207 m-s and 1123 s  $\nu(\text{C-O})$ , 849 m-s  $\nu(\text{C-N})$  and/or  $\delta(\text{C}_{\text{Ar}}\text{-H})$ , 736 m  $\delta(\text{C}_{\text{Ar}}\text{-H})$ . HRESI<sup>+</sup>-MS:  $m/z$ : 415.9887 [ $\{2,4,6\text{-(MeO)}_3\text{C}_6\text{H}_2\}(4\text{-NO}_2\text{-C}_6\text{H}_4)\text{I}\}^+$  (calcd 415.9989). HRESI<sup>-</sup>-MS:  $m/z$ : 149.4895  $[\text{Pt}(\text{CN})_4]^{2-}$  (calcd 149.4891), 272.9742  $[\text{Pt}(\text{CN})_3]^-$  (calcd 272.9740).

## S7. Experimental data

**Figure S20.** IR spectrum of **1** in KBr.

**Figure S21.** ATR-FTIR spectrum of **1**.



**Figure S22.** IR spectrum of **2** in KBr.

**Figure S23.** ATR-FTIR spectrum of **2**.

**Figure S24.** IR spectrum of **3** in KBr.

**Figure S25.** ATR-FTIR spectrum of **3**.

[Ar<sup>1</sup>Ar<sup>2</sup>I](CF<sub>3</sub>CO<sub>2</sub>), IR in NaCl (*lit.*<sup>6</sup>): 3098 w, 2449 w, 1664 s, 1520 s, 1347 s.

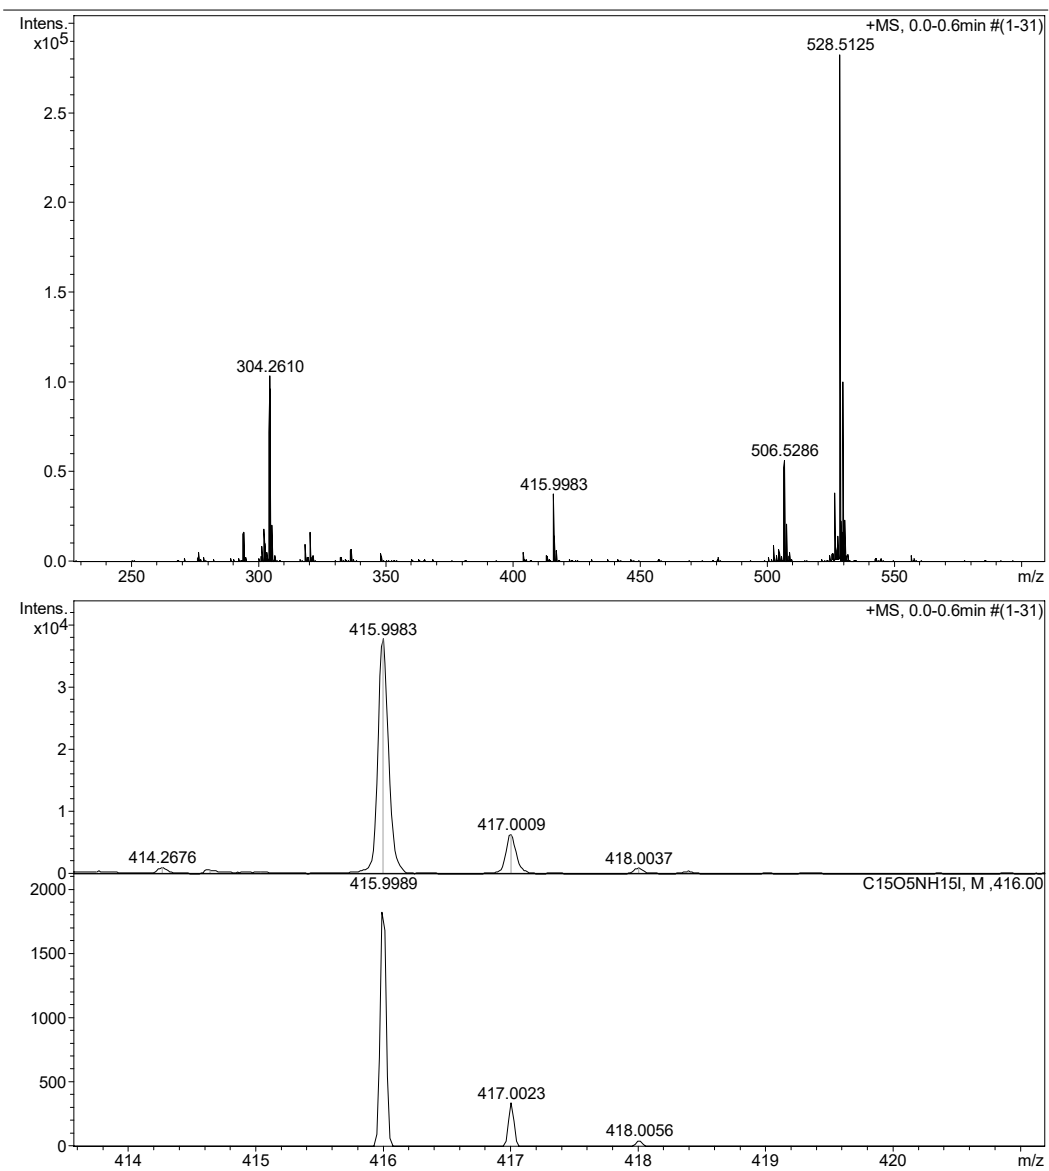

**Figure S26.** High resolution ESI-MS<sup>+</sup> spectrum of 1.

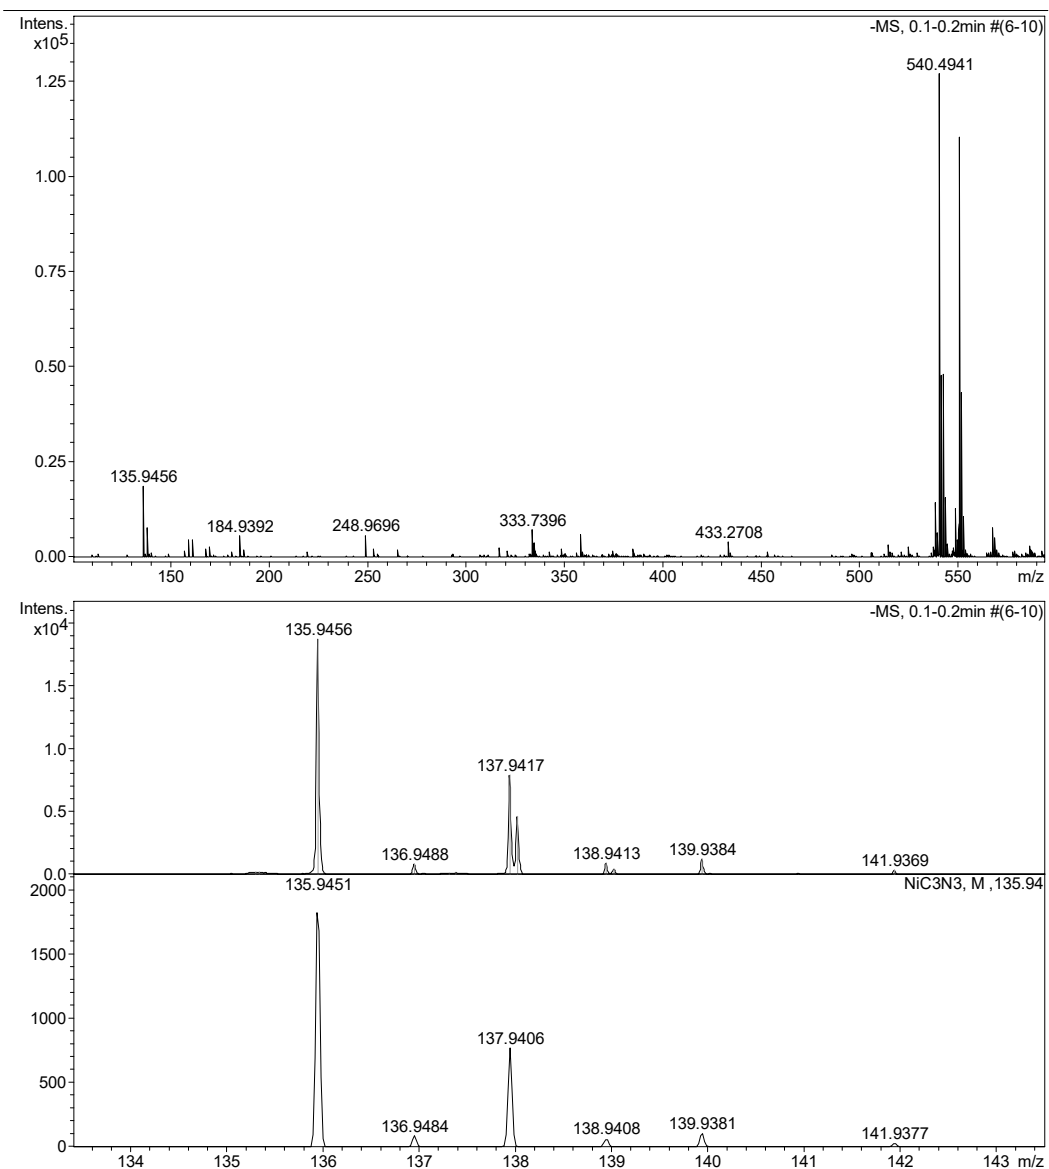

**Figure S27.** High resolution ESI-MS<sup>-</sup> spectrum of **1**.

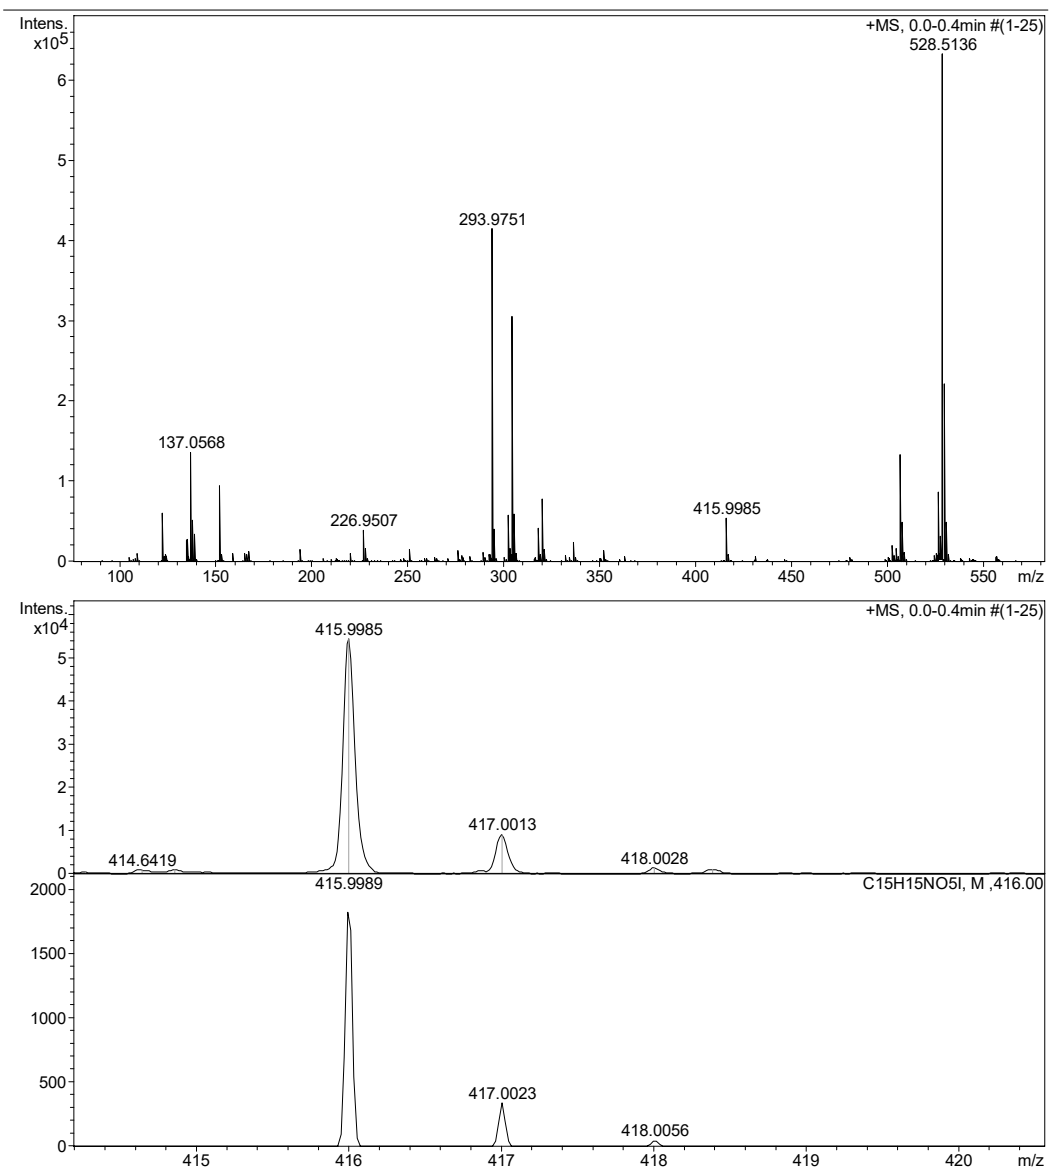

**Figure S28.** High resolution ESI-MS<sup>+</sup> spectrum of **2**.

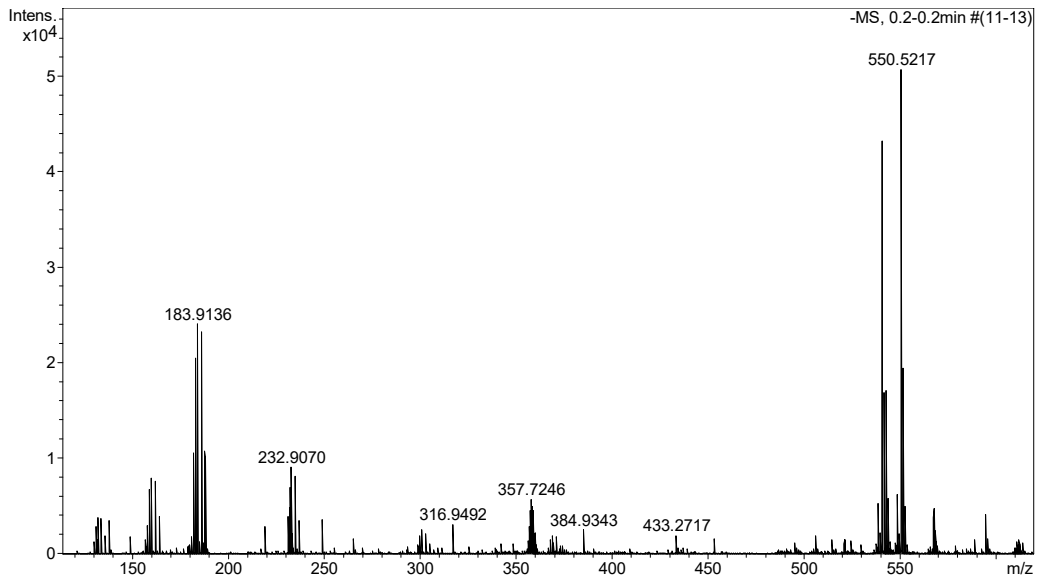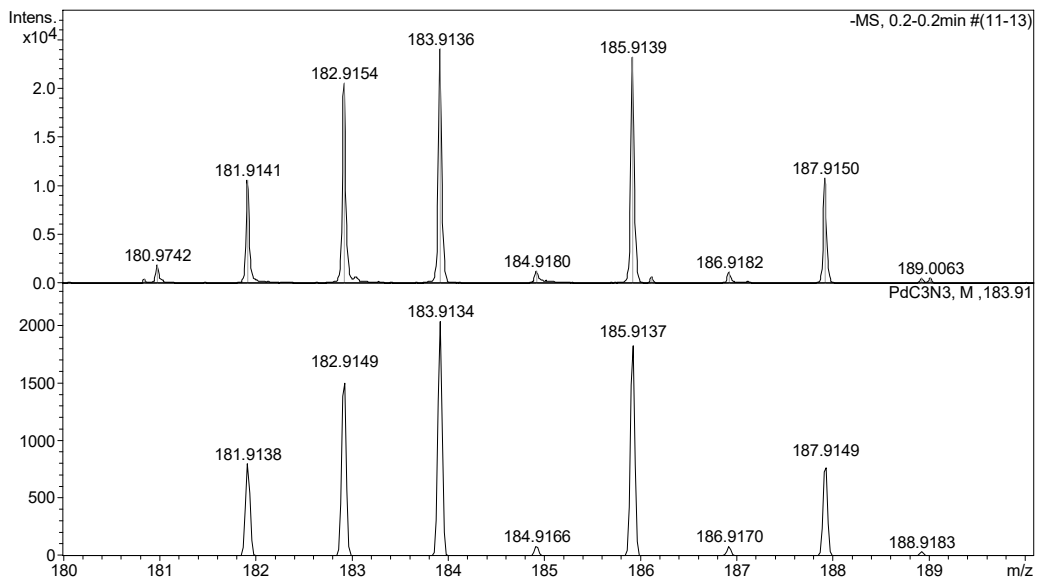



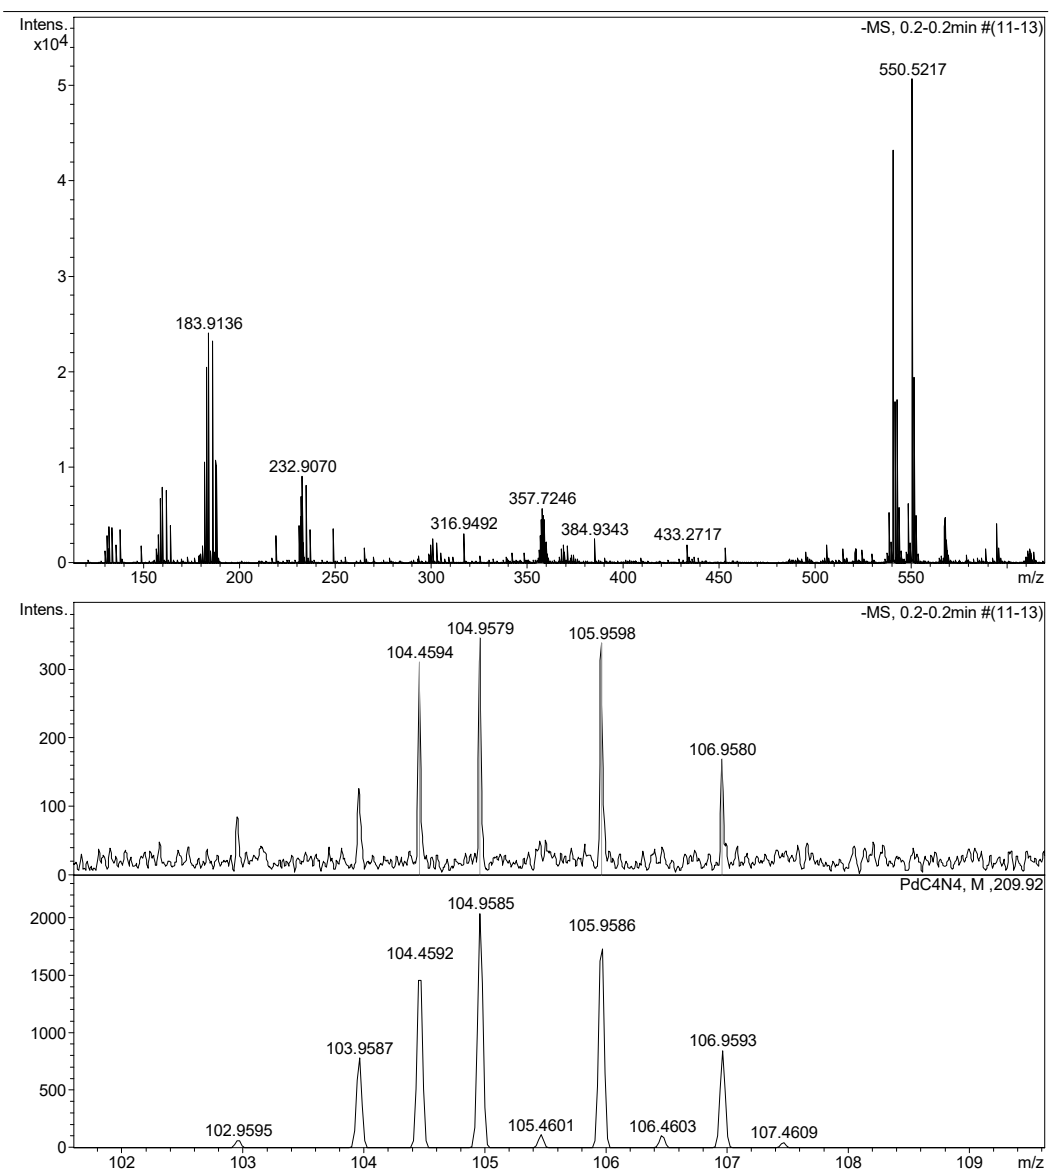

**Figure S29.** High resolution ESI-MS<sup>-</sup> spectrum of **2**.

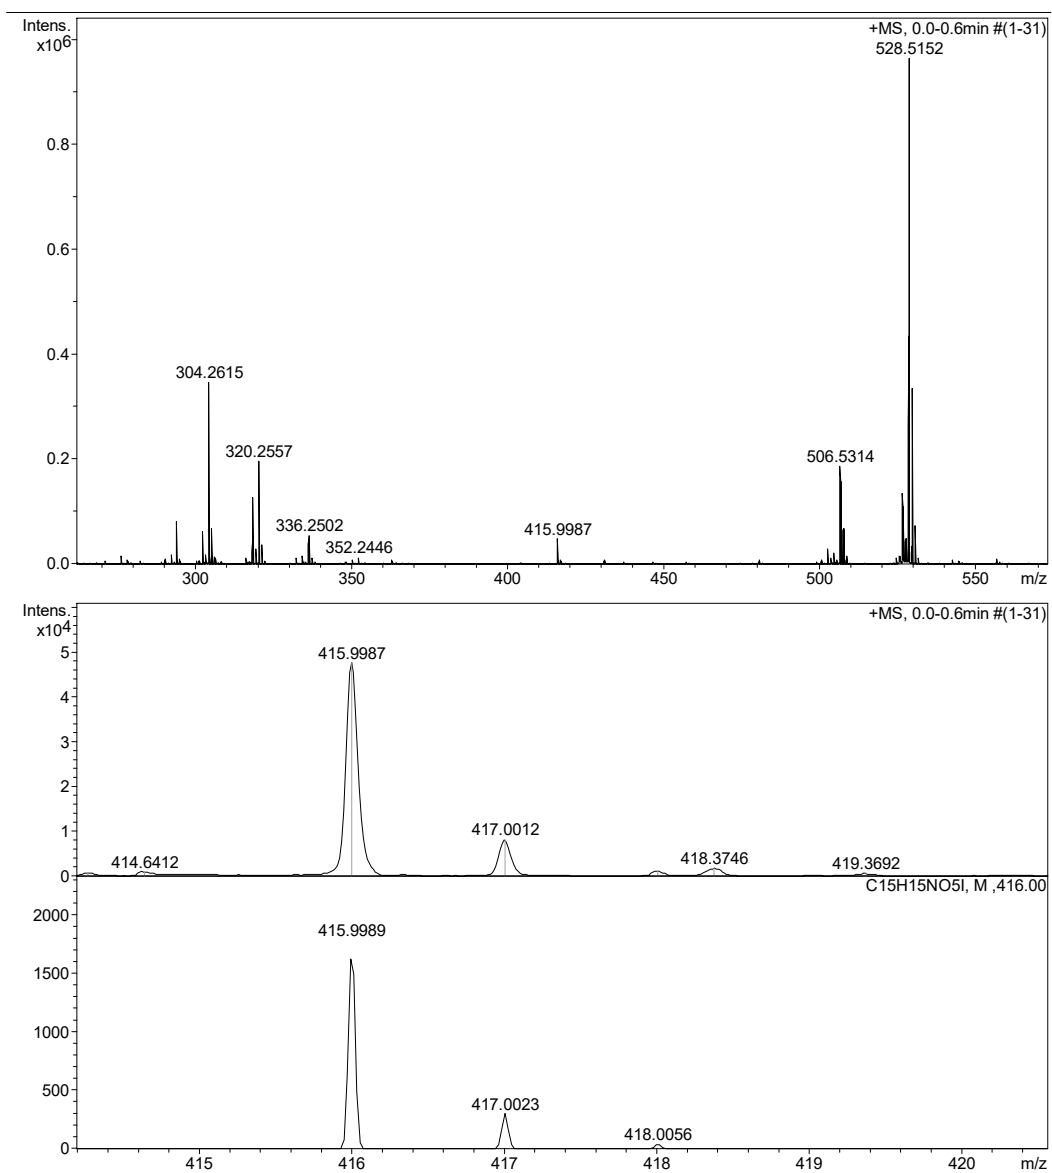

**Figure S30.** High resolution ESI-MS<sup>+</sup> spectrum of **3**.

# Display Report

## Analysis Info

Analysis Name D:\Data\2023\February\20\SVV\_155-.d  
Method tune\_low.m  
Sample Name  
Comment

Acquisition Date 20.02.2023 16:13:29

Operator Bruker Customer  
Instrument / Ser# micrOTOF 10223

## Acquisition Parameter

|             |            |                      |          |                  |           |
|-------------|------------|----------------------|----------|------------------|-----------|
| Source Type | ESI        | Ion Polarity         | Negative | Set Nebulizer    | 0.6 Bar   |
| Focus       | Not active |                      |          | Set Dry Heater   | 180 °C    |
| Scan Begin  | 21 m/z     | Set Capillary        | 4500 V   | Set Dry Gas      | 6.0 l/min |
| Scan End    | 1000 m/z   | Set End Plate Offset | -500 V   | Set Divert Valve | Source    |

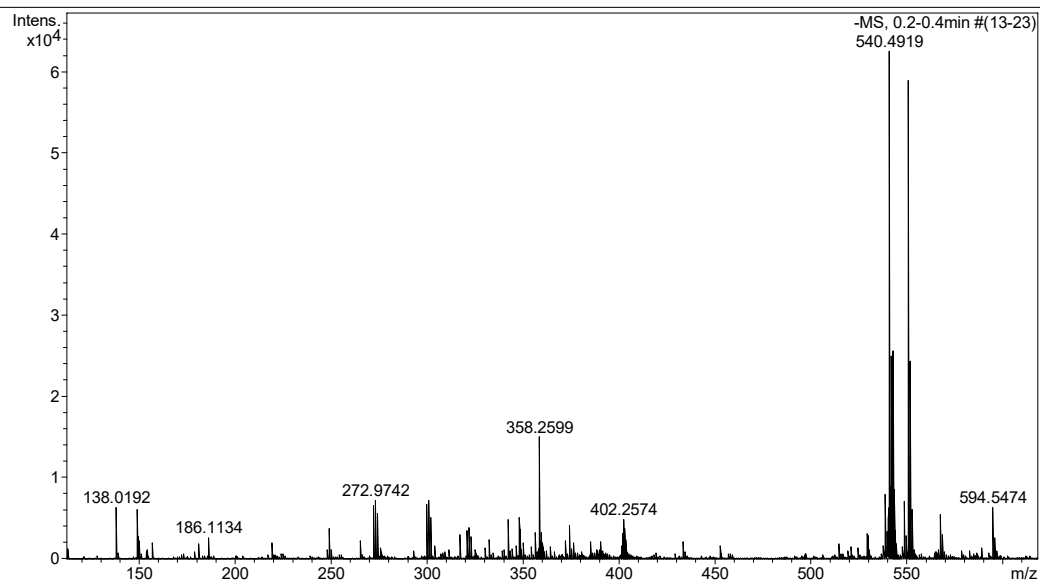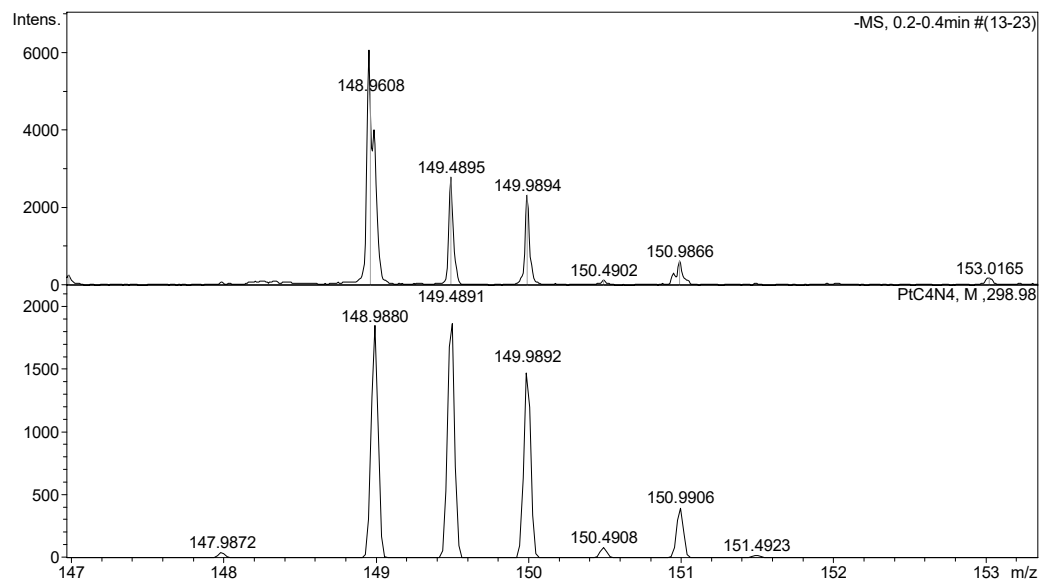

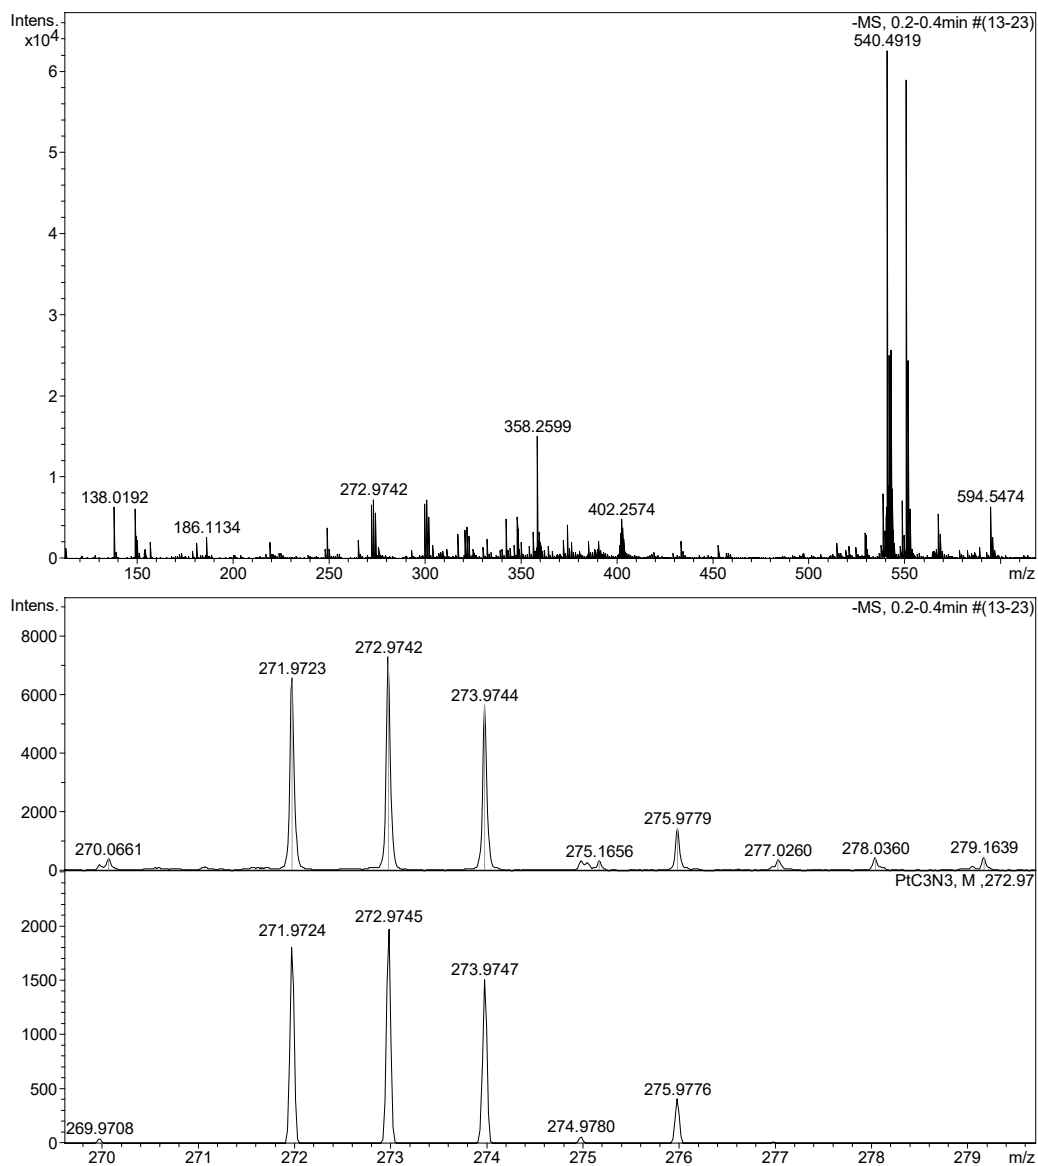

**Figure S31.** High resolution ESI-MS<sup>-</sup> spectrum of **3**.

## References

1. V. V. Suslonov, N. S. Soldatova, P. S. Postnikov, G. Resnati, V. Y. Kukushkin, D. M. Ivanov and N. A. Bokach, Diaryliodonium Tetracyanidometallates Self-Assemble into Halogen-Bonded Square-Like Arrays, *Crystal Growth & Design*, 2022, **22**, 2749-2758.
2. V. V. Suslonov, A. A. Eliseeva, A. S. Novikov, D. M. Ivanov, A. Y. Dubovtsev, N. A. Bokach and V. Y. Kukushkin, Tetrachloroplatinate(II) anion as a square-planar tecton for crystal engineering involving halogen bonding, *Crystengcomm*, 2020, **22**, 4180-4189.
3. V. V. Suslonov, N. S. Soldatova, D. M. Ivanov, B. Galmés, A. Frontera, G. Resnati, P. S. Postnikov, V. Y. Kukushkin and N. A. Bokach, Diaryliodonium Tetrachloroplatinates(II): Recognition of a Trifurcated Metal-Involving  $\mu_3$ -I $\cdots$ (Cl,Cl,Pt) Halogen Bond, *Crystal Growth & Design*, 2021, **21**, 5360-5372.
4. G. R. Desiraju, P. S. Ho, L. Kloo, A. C. Legon, R. Marquardt, P. Metrangolo, P. Politzer, G. Resnati and K. Rissanen, Definition of the halogen bond (IUPAC Recommendations 2013), *Pure Appl. Chem.*, 2013, **85**, 1711.
5. A. Bondi, Van der Waals Volumes and Radii, *J. Phys. Chem.*, 1964, **68**, 441–451.
6. A. H. Sandtorv and D. R. Stuart, Metal-free Synthesis of Aryl Amines: Beyond Nucleophilic Aromatic Substitution, *Angewandte Chemie International Edition*, 2016, **55**, 15812-15815.
